# THE AMERICAN JOURNAL OF PSYCHIATRY

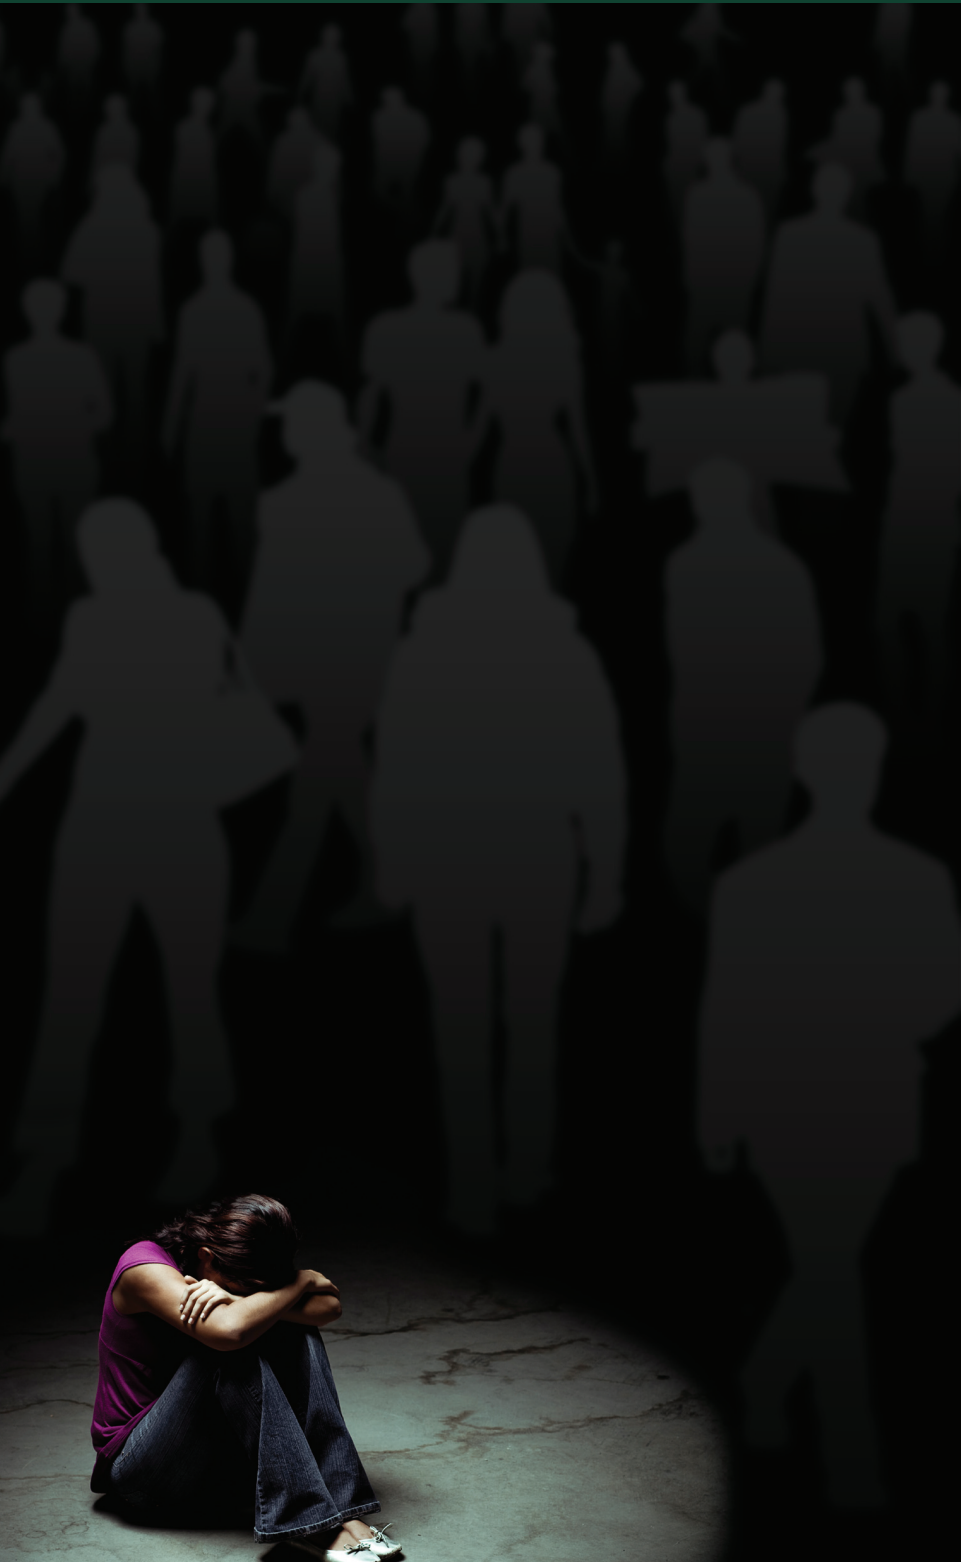

**The Interpersonal Dimension of  
Borderline Personality Disorder:  
Toward A Neuropeptide Model**

Barbara Stanley, Ph.D. and  
Larry J. Siever, M.D.

24

◀ **Early Risk Factors and  
Developmental Pathways to  
Chronic High Inhibition and  
Social Anxiety Disorder in  
Adolescence**

Marilyn J. Essex, Ph.D., et al.

40

◀ **Overgeneralization of  
Conditioned Fear as a  
Pathogenic Marker of  
Panic Disorder**

Shmuel Lissek, Ph.D., et al.

47

**Association of Poor Childhood  
Fear Conditioning and Adult  
Crime**

Yu Gao, Ph.D., et al.

56

**Continuing Medical Education**

113

**January 2010**

**Volume 167 • Number 1**

---

Official Journal of the  
AMERICAN PSYCHIATRIC ASSOCIATION

---

[ajp.psychiatryonline.org](http://ajp.psychiatryonline.org)
