**A0 Editorial Board**

**A2 Highlights of this issue**

**Editorial**

- 1 National dissemination of effective parenting programmes to improve child outcomes**  
S. Scott

**Review article**

- 4 Pharmacotherapy for borderline personality disorder: Cochrane systematic review of randomised trials**  
K. Lieb, B. Vollm, G. Rucker, A. Timmer, and J.M. Stoffers
- 12 The kiss – psychiatry in pictures**  
Ismond Rosen

**Papers**

- 13 Comparison of risk factors for the onset and maintenance of depression**  
C. Bottomley, I. Nazareth, F. Torres-Gonzalez, I. Svab, H.-I. Maarros, M.I. Geerlings, M. Xavier, S. Saldivia, and M. King
- 18 Risk of psychological distress following severe obstetric complications in Benin: the role of economics, physical health and spousal abuse**  
E. Fottrell, L. Kanhonou, S. Goufodji, D.P. Béhague, T. Marshall, V. Patel, and V. Filippi
- 26 Risk factors for suicide in rural south India**  
S.D. Manoranjitham, A.P. Rajkumar, P. Thangadurai, J. Prasad, R. Jayakaran, and K.S. Jacob
- 31 Non-fatal repetition of self-harm: population-based prospective cohort study in Taiwan**  
V.C.H. Chen, H.K.L. Tan, A.T.A. Cheng, C.-Y. Chen, L.-R. Liao, R. Stewart, M. Dewey, and M. Prince
- 36 Risk of developing dementia in people with diabetes and mild cognitive impairment**  
L. Velayudhan, M. Poppe, N. Archer, P. Proitsi, R.G. Brown, and S. Lovestone
- 40 Desire Magloire Bourneville – extra**  
Jean-Pierre Schuster and Yann Le Strat
- 41 Prevalence and correlates of auditory vocal hallucinations in middle childhood**  
A.A. Bartels-Velthuis, J.A. Jenner, G. van de Willige, J. van Os, and D. Wiersma

- 47 Brain serotonin-2 receptors in acute mania**  
L.N. Yatham, P.F. Liddle, J. Erez, M. Kauer-Sant'Anna, R.W. Lam, M. Imperial, V. Sossi, and T.J. Ruth
- 52 White matter microstructural abnormalities in euthymic bipolar disorder**  
K.A.N. Macritchie, A.J. Lloyd, M.E. Bastin, K. Vasudev, P. Gallagher, R. Eyre, I. Marshall, J.M. Wardlaw, I.N. Ferrier, P.B. Moore, and A.H. Young
- 59 Enhanced relapse prevention for bipolar disorder by community mental health teams: cluster feasibility randomised trial**  
F. Lobban, L. Taylor, C. Chandler, E. Tyler, P. Kinderman, R. Kolamunnage-Dona, C. Gamble, S. Peters, E. Pontin, W. Sellwood, and R.M. Morriss
- 63 A marvellous recovery – extra**  
Thomas Bewley
- 64 Validity of a short clinical interview for psychiatric diagnosis: the mini-SCAN**  
F.J. Nienhuis, G. van de Willige, C.A. Th. Rijnders, P. de Jonge, and D. Wiersma
- 69 TENTS guidelines: development of post-disaster psychosocial care guidelines through a Delphi process**  
J.I. Bisson, B. Tavakoly, A.B. Witteveen, D. Ajdukovic, L. Jehel, V.J. Johansen, D. Nordanger, F.O. Garcia, R.-L. Punamaki, U. Schnyder, A.U. Sezgin, L. Wittmann, and M. Olff
- 74 A Lover's Quarrel – poems by doctors**  
Vincent Hanlon

**Short report**

- 75 Ethnicity and coercion among involuntarily detained psychiatric in-patients**  
O. Bennewith, T. Amos, G. Lewis, C. Katsakou, T. Wykes, R. Morriss, and S. Priebe

**Columns**

- 77 Correspondence**
- 80 Book reviews**
- 82 Contents of Advances in Psychiatric Treatment**
- 83 Books received**
- 85 Contents of the American Journal of Psychiatry**
- 86 From the Editor's desk**

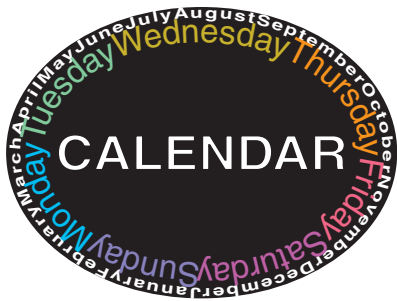

For free listing of your organization's official annual or regional meeting, please send us the following information: sponsor, location, inclusive dates, type and number of continuing education credits (if available), and the name, address, and telephone number of the person or group to contact for more information. In order for an event to appear in our listing, all notices and changes must be received at least 6 months in advance of the meeting and should be addressed to:

*Calendar, American Journal of Psychiatry, 1000 Wilson Boulevard, Suite 1825, Arlington, VA 22209-3901, jblair@psych.org (e-mail).*

*Because of space limitations, only listings of meetings of the greatest interest to Journal readers will be included.*

## JANUARY 2010

**Jan 13–17**, The American Psychoanalytic Association (APsaA) annual National Meeting, New York. Contact: [www.apsa.org/Meetings/2010\\_National\\_Meeting.aspx](http://www.apsa.org/Meetings/2010_National_Meeting.aspx)

## MARCH

**March 17–20**, 21st Annual Meeting, American Neuropsychiatric Association, Tampa, Fla. Contact: [www.anpaonline.org](http://www.anpaonline.org) (web site).

**March 17–20**, 4th Biennial Conference of the ISBD, Sao Paulo, Brazil. Contact: [isbd2010@icms.com.au](mailto:isbd2010@icms.com.au) (e-mail), [www.isbd2010.org](http://www.isbd2010.org) (web-site).

## APRIL

**April 9–11**, The Annual Fay Lecture Series in Analytical Psychology, "Connecting with South Africa: Inter-Cultural Communication and Understanding," Texas A&M University, College Station, Texas. Contact: (979) 845-2530 tel, [drossen@psych.tamu.edu](mailto:drossen@psych.tamu.edu) (e-mail).

## MAY

**May 20–23**, 54th Annual Meeting of the American Academy of Psychoanalysis and Dynamic Psychiatry, New Orleans, LA. Contact: Executive Office,

American Adademy of Psychoanalysis and Dynamic Psychiatry, PO Box 30, Bloomfield, CT 06002; (888) 691-8281, (860) 286-0787, [info@aapdp.org](mailto:info@aapdp.org) (e-mail), [www.aapdp.org](http://www.aapdp.org) (web site).

**May 22–27**, 163rd Annual Meeting of the American Psychiatric Association, New Orleans, LA. Contact: Cathy Nash, APA Annual Meetings Dept., 1000 Wilson Blvd., Ste. 1825, Arlington, VA 22209; (703) 907-7822.

## SEPTEMBER

**September 14–19**, 1st joint annual meeting of the EEG and Clinical Neuroscience Society (ECNS), International Society for Neuroimaging in Psychiatry (ISNIP) and the International Society for Brain Electromagnetic Topography (ISBET), Istanbul, Turkey. Contact: Kemal Arikian [mkarikan@istanbul.edu.tr](mailto:mkarikan@istanbul.edu.tr) (e-mail) [www.ecns2010.com](http://www.ecns2010.com) (web site).

## OCTOBER

**October 14–17**, 62nd Institute on Psychiatric Services, American Psychiatric Association, Boston, MA. Contact: Jill Gruber, APA Annual Meetings Dept., 1000 Wilson Blvd., Ste. 1825, Arlington, VA 22209; (703) 907-7815.

**October 26–31**, 57th Annual Meeting of the American Academy of Child and Adolescent Psychiatry, New York, NY.

Contact: AACAP, 3615 Wisconsin Avenue, N.W., Washington, DC 20016-3007; (202) 966-7300 (tel), (202) 966-2891 (fax), [meetings@aacap.org](mailto:meetings@aacap.org) (e-mail), [www.aacap.org](http://www.aacap.org) (web site).

## MAY 2011

**May 14–19**, 164th Annual Meeting of the American Psychiatric Association, Honolulu, HI. Contact: Cathy Nash, APA Annual Meetings Dept., 1000 Wilson Blvd., Ste. 1825, Arlington, VA 22209; (703) 907-7822.

## OCTOBER

**October 18–23**, 58th Annual Meeting of the American Academy of Child and Adolescent Psychiatry, Toronto, Ontario. Contact: AACAP, 3615 Wisconsin Avenue, N.W., Washington, DC 20016-3007; (202) 966-7300 (tel), (202) 966-2891 (fax), [meetings@aacap.org](mailto:meetings@aacap.org) (e-mail), [www.aacap.org](http://www.aacap.org) (web site).

**October 27–30**, 63rd Institute on Psychiatric Services, American Psychiatric Association, San Francisco, CA. Contact: Jill Gruber, APA Annual Meetings Dept., 1000 Wilson Blvd., Ste. 1825, Arlington, VA 22209; (703) 907-7815.

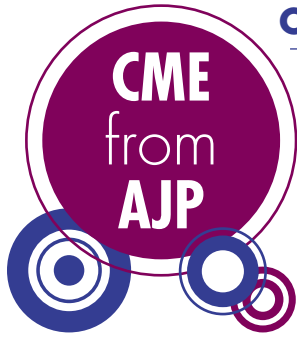

## Continuing Medical Education

Three articles in this issue form the basis of a short course with questions that can be answered for up to 1 *AMA PRA Category 1 Credit™* each by visiting <http://cme.psychiatryonline.org/> and clicking on “American Journal of Psychiatry CME.”

CME credit is issued only online, and a paid subscription to the AJP CME course program is required.

This month's courses appear on pages 113–116.

**FREE AUDIO!**

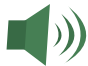

## Have You Heard?

You can listen to highlights of *The American Journal of Psychiatry* by downloading a monthly free .mp3 audio file from our web site (<http://ajp.psychiatryonline.org/misc/audio.dtl>) or by subscribing to the AJP Audio podcast at iTunes or other feed reader (e.g., NewzCrawler, FeedDemon, Bloglines, Google Reader). Presented by Deputy Editor Dr. Susan Schultz or by Editorial Director Michael Roy, each month's audio lasts approximately 30 minutes and covers several research articles, the Treatment in Psychiatry feature, and one or two editorials.

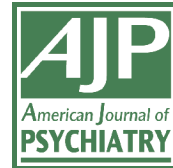

Coming in the February 2010 issue\*

## THE AMERICAN JOURNAL OF PSYCHIATRY

*The Development of the Feighner Criteria: A Historical Perspective*

K.S. Kendler, R.A. Muñoz, and G. Murphy

*Suicide in HIV-Infected Individuals and the General Population in Switzerland, 1988–2008*

O. Keiser, A. Spoerri, M.W.G. Brinkhof, B. Hasse, A. Gayet-Ageron, F. Tissot, A. Christen, M. Battegay, P. Schmid, E. Bernasconi, M. Egger, for the Swiss HIV Cohort Study and the Swiss National Cohort

*A Randomized Trial of Medical Care Management for Community Mental Health Settings: The Primary Care Access, Referral, and Evaluation (PCARE) Study*

B.G. Druss, S.A. von Esenwein, M.T. Compton, K.J. Rask, L. Zhao, and R.M. Parker

*Static and Dynamic Cognitive Deficits in Childhood Preceding Adult Schizophrenia: A 30-Year Study*

A. Reichenberg, A. Caspi, H. Harrington, R. Houts, R.S.E. Keefe, R.M. Murray, R. Poulton, and T.E. Moffitt

\*Can't wait? Visit [ajp.psychiatryonline.org](http://ajp.psychiatryonline.org) and click the “AJP in Advance” logo to see all articles uploaded in advance of print!

# The Residents' JOURNAL

Last Issue's

## Table of Contents

- 1 Introduction  
Ada Ikeako, M.D.
- 2 Interview With Sarah H. Lisanby, M.D.  
Ada Ikeako, M.D.
- 3 Cost Saving Innovation:  
The Electronic Medical  
Record  
Ada Ikeako, M.D.
- 4 Interview with Bradley  
Peterson, M.D.  
Ada Ikeako, M.D.
- 5 A Day in the Life of a  
Research Fellow: Training to  
Become an Innovator  
Ragy R. Girgis, M.D.
- 6 Resident's Guide to Clinical  
Psychiatry: A Book Review  
M. Nadeem Mazhar, M.D.,  
F.R.C.P.C., M.R.C.Psych

The Residents' Journal is sent free-of-charge to all psychiatry residents. Anyone interested in being included on the distribution list should contact Angela Moore, the Residents' Journal staff editor at [ajp@psych.org](mailto:ajp@psych.org) with "Subscribe to Residents' Journal" in the subject line.

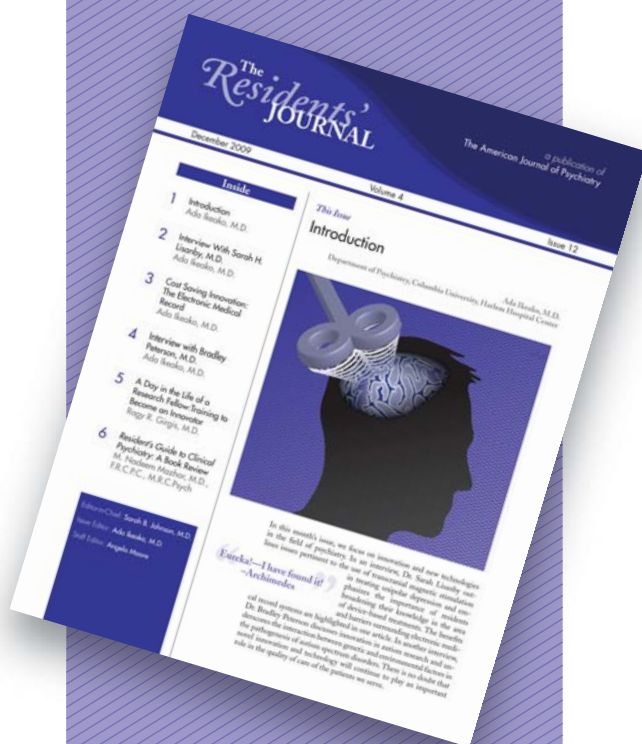

a publication of  
The American Journal of Psychiatry

# get CME from AJP

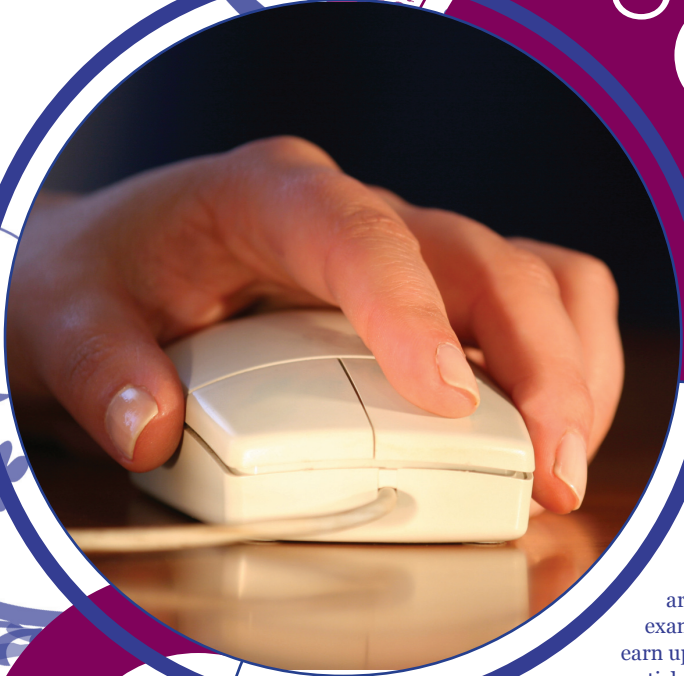

Brief companion exams are created for three of the most influential articles from each issue. By reading the articles and completing the online exams, you can test your knowledge and earn up to 1 *AMA PRA Category 1 Credit*<sup>™</sup> per article. Correct answers are highlighted for your reference upon completion of the course; there is no minimum threshold score necessary for the credit. A

link from the question to the correct answer in context will also be highlighted in the associated article, thus extending the learning experience.

CME credit is only provided online, and a subscription to the AJP CME program is required. From the moment you subscribe to the AJP CME program, you will be able to select from 72 courses from among 40 possible subject areas. You'll also be able to access the next 33 courses as they become available. For more information and pricing, please go to <http://cme.psychiatryonline.org/misc/aboutajpcme.shtml>

This activity is sponsored by the American Psychiatric Association. The American Psychiatric Association is accredited by the Accreditation Council for Continuing Medical Education to provide continuing medical education for physicians. The American Psychiatric Association designates each educational activity for a maximum of 1 *AMA PRA Category 1 Credit*<sup>™</sup>. Physicians should only claim credit commensurate with the extent of their participation in the activity.

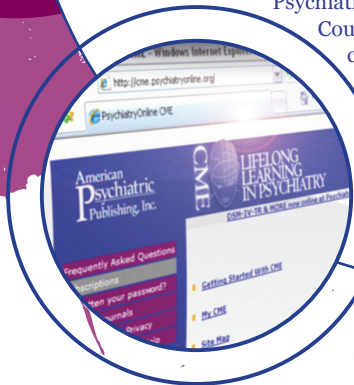

Fulfill your CME requirement while staying current on the latest advances in psychiatry.  
Subscribe to AJP CME!
