# SEE ME FOR WHO I CAN BE

GREG, 35\*

Diner Worker  
Diagnosis: Schizophrenia

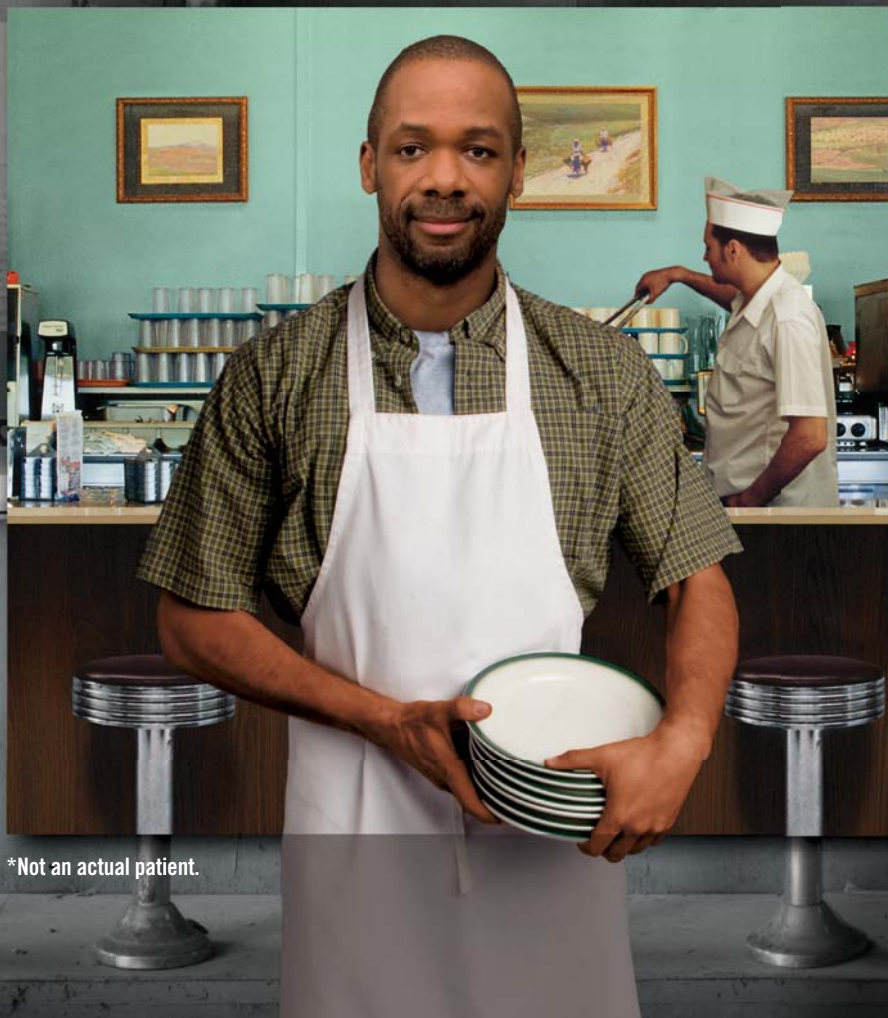

\*Not an actual patient.

GEODON is indicated for schizophrenia. For full symptoms and diagnostic criteria, see the *DSM-IV-TR*<sup>®</sup> (2000).

#### Important Safety Information

Elderly patients with dementia-related psychosis treated with antipsychotic drugs are at an increased risk of death compared to placebo. GEODON is not approved for the treatment of patients with dementia-related psychosis.

GEODON is contraindicated in patients with a known history of QT prolongation, recent acute myocardial infarction, or uncompensated heart failure, and should not be used with certain other QT-prolonging drugs. GEODON has a greater capacity to prolong the QT<sub>c</sub> interval than several antipsychotics. In some drugs, QT prolongation has been associated with torsade de pointes, a potentially fatal arrhythmia. In many cases this would lead to the conclusion that other drugs should be tried first. Hypokalemia may increase the risk of QT prolongation and arrhythmia.

As with all antipsychotic medications, a rare and potentially fatal condition known as neuroleptic malignant syndrome (NMS) has been reported with GEODON. NMS can cause hyperpyrexia, muscle rigidity, diaphoresis, tachycardia, irregular pulse or blood pressure, cardiac dysrhythmia, and altered mental status. If signs and symptoms appear, immediate discontinuation, treatment, and monitoring are recommended.

Prescribing should be consistent with the need to minimize tardive dyskinesia (TD), a potentially irreversible dose- and duration-dependent syndrome. If signs and symptoms appear, discontinuation should be considered since TD may remit partially or completely.

Hyperglycemia-related adverse events, sometimes serious, have been reported in patients treated with atypical antipsychotics. There have been few reports of hyperglycemia or diabetes in patients treated with GEODON, and it is not known if GEODON is associated with these events. Patients treated with an atypical antipsychotic should be monitored for symptoms of hyperglycemia.

Precautions include the risk of rash, orthostatic hypotension, and seizures.

In short-term schizophrenia trials, the most commonly observed adverse events associated with GEODON at an incidence of  $\geq 5\%$  and at least twice the rate of placebo were somnolence and respiratory tract infection.

Please see brief summary of prescribing information on adjacent page.

For more information, please visit [www.pfizerpro.com/GEODON](http://www.pfizerpro.com/GEODON)

**GEODON**<sup>®</sup>  
(ziprasidone HCl) Capsules



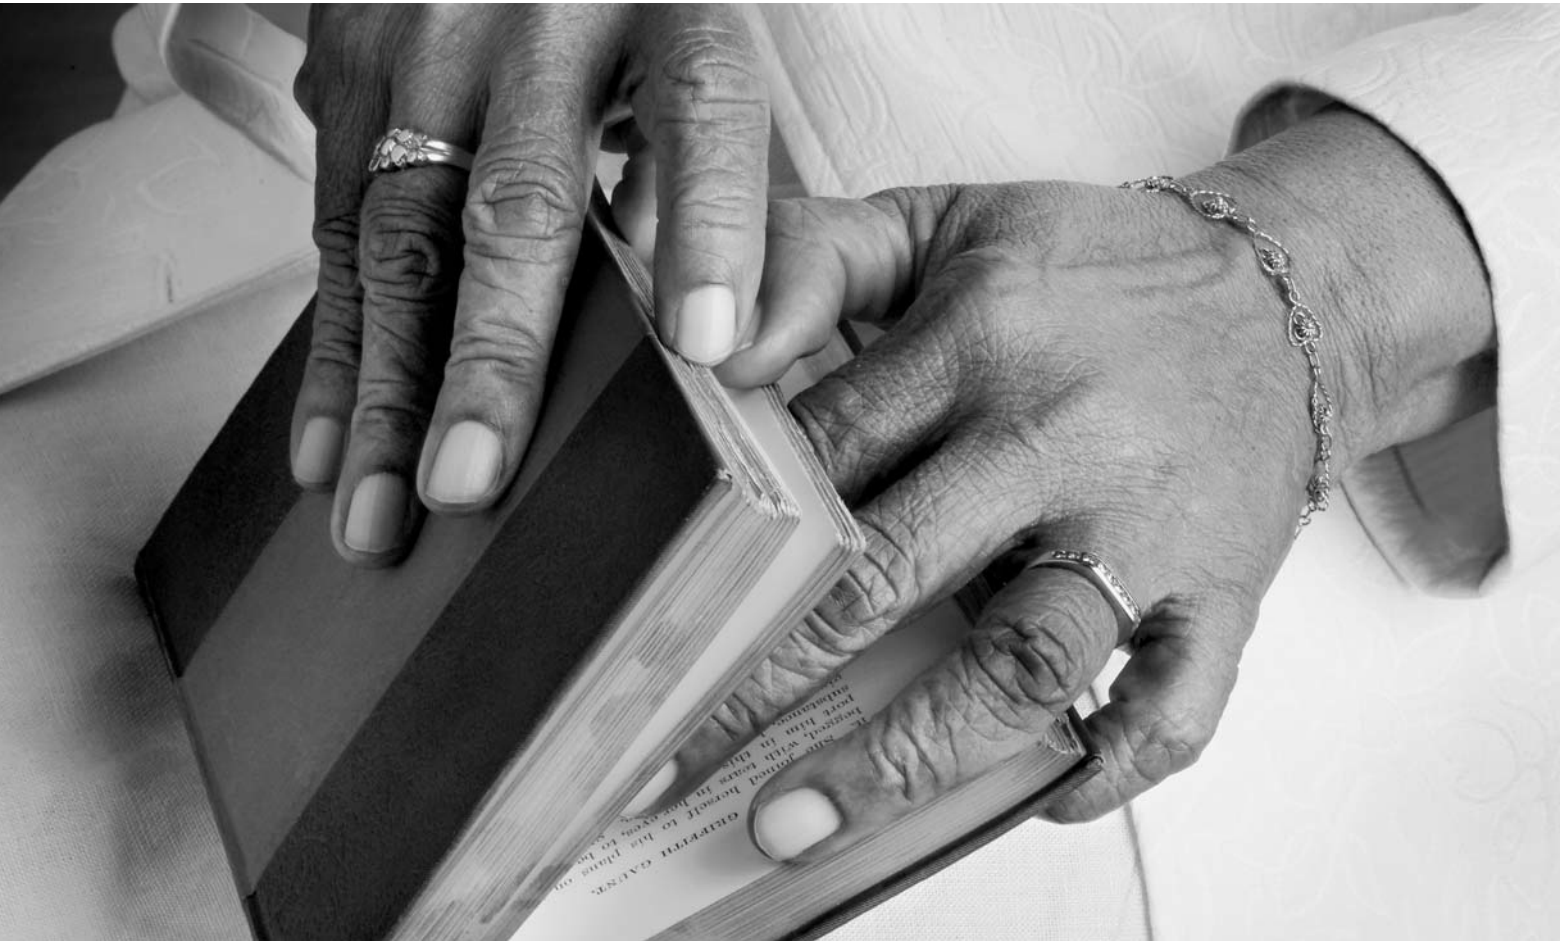

## Complex puzzles. Comprehensive solutions.

At Western Psychiatric Institute and Clinic of UPMC, we take on complex disorders that some other centers won't even attempt to treat.

But whether a patient has a difficult-to-treat disorder or one more easily treated, teams of specialists in psychiatry, psychopharmacology, clinical psychology, and medicine craft complete, individualized treatment plans that draw upon the latest clinical research, much of it conducted by our own investigators. Whether we're interpreting our clinical trial data or a patient's lab results, our work to advance the understanding and treatment of bipolar disorder,

eating disorders, autism, and geriatric behavioral health issues is world-class. In fact, we have one of the world's most comprehensive programs for mood disorders, with research-based treatments for patients at every level of need, at every stage of life.

With more than 400 inpatient psychiatric beds and 75 ambulatory programs, we care for people when they're feeling their worst and support them when they're at their best, back with their families in their home towns. Each year, Western Psychiatric helps some 30,000 people of all ages — at all stages of recovery, from all over the world — live healthier and more productive lives.

# UPMC

[upmc.com](http://upmc.com) | 1-800-533-UPMC

Affiliated with the **University of Pittsburgh School of Medicine**, UPMC is ranked among the nation's best hospitals by *U.S. News & World Report*.

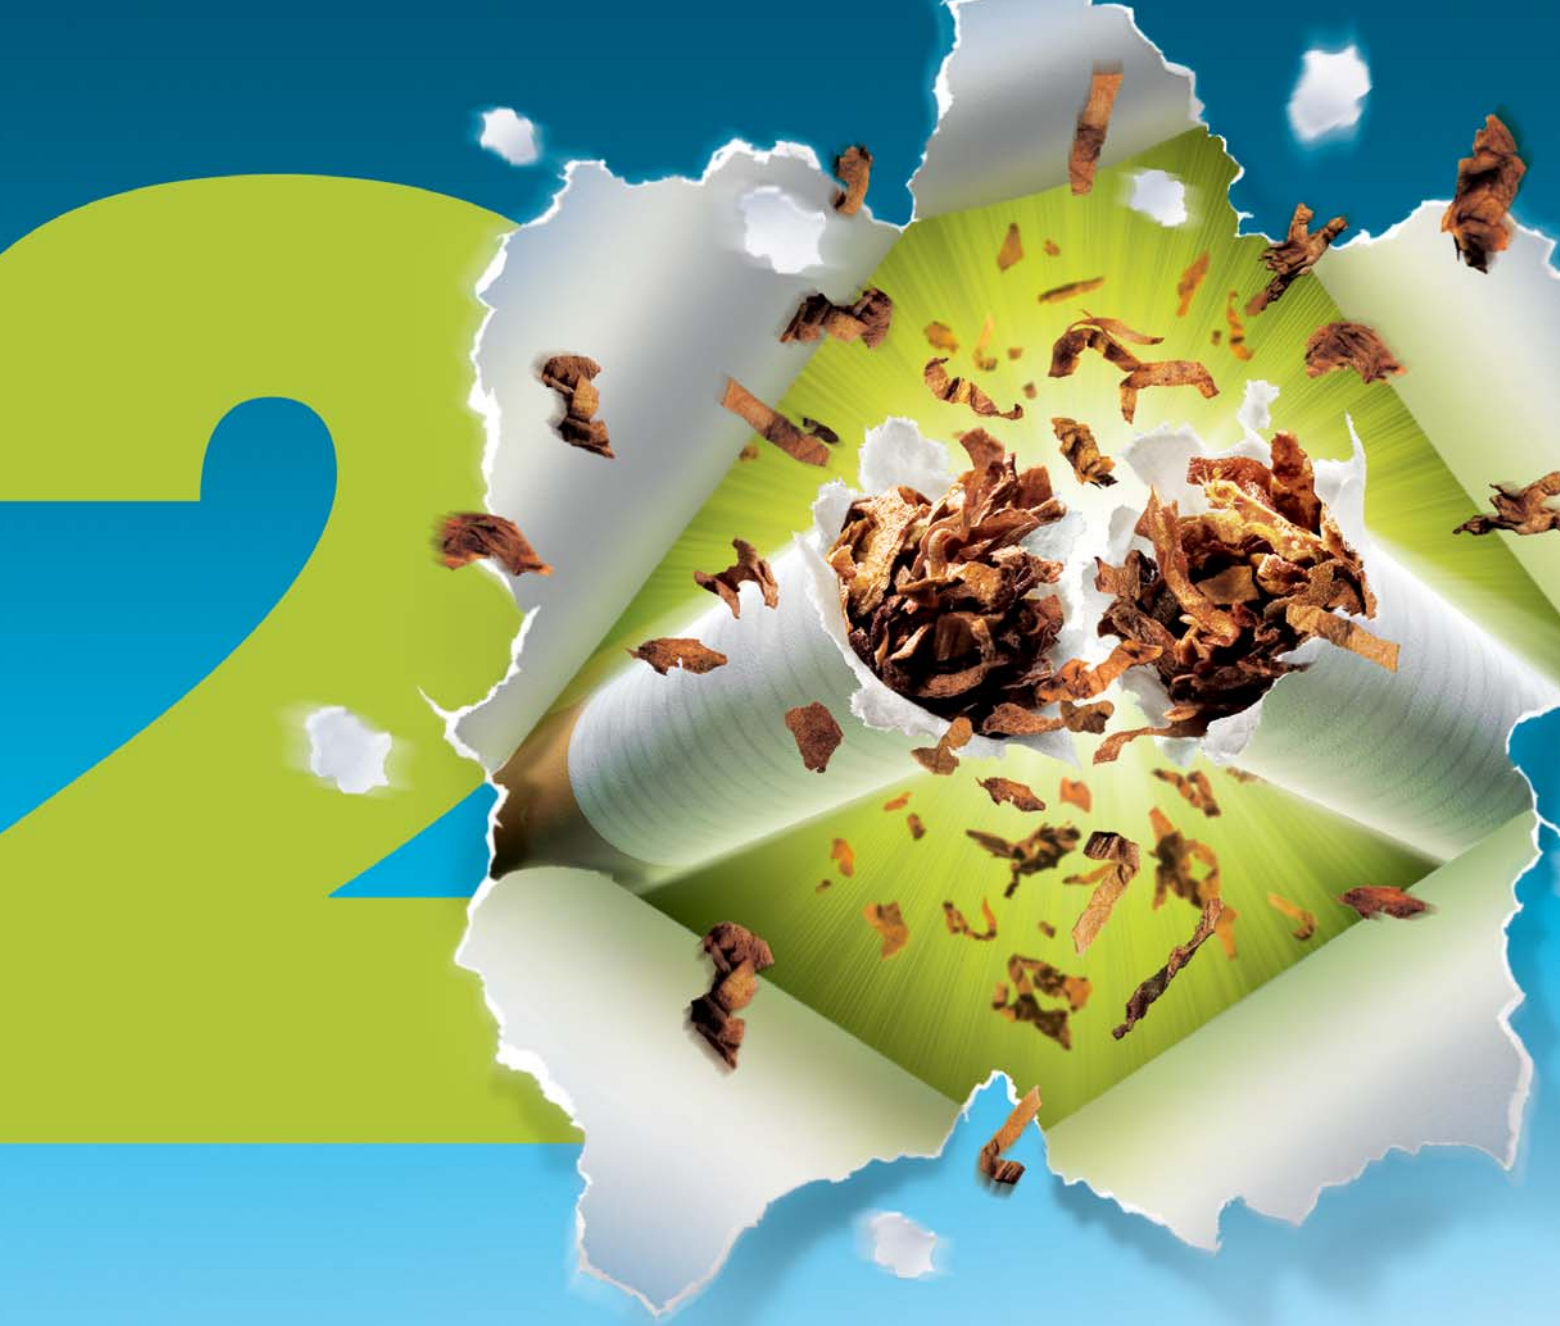

### **IMPORTANT SAFETY INFORMATION**

**All patients being treated with CHANTIX should be observed for neuropsychiatric symptoms including changes in behavior, hostility, agitation, depressed mood, and suicide-related events, including ideation, behavior, and attempted suicide. These symptoms, as well as worsening of pre-existing psychiatric illness and completed suicide have been reported in some patients attempting to quit smoking while taking CHANTIX in the post-marketing experience.**

**These events have occurred in patients with and without pre-existing psychiatric disease. Patients with serious psychiatric illness such as schizophrenia, bipolar disorder, and major depressive disorder did not participate in the pre-marketing studies of CHANTIX and the safety and efficacy of CHANTIX in such patients has not been established.**

**Advise patients and caregivers that the patient should stop taking CHANTIX and contact a healthcare provider immediately if agitation, hostility, depressed mood, or changes in behavior or thinking that are not typical for the patient are observed, or if the patient develops suicidal ideation or suicidal behavior. In many post-marketing cases, resolution of symptoms after discontinuation of CHANTIX was reported, although in some cases the symptoms persisted; therefore, ongoing monitoring and supportive care should be provided until symptoms resolve.**

CHANTIX is indicated as an aid to smoking cessation treatment in adults 18 and over. Patients may benefit from behavioral modification and support during their quit attempt. Patients should be encouraged to continue to attempt to quit if they have early lapses after quit day.

**[www.pfizerpro.com/chantix](http://www.pfizerpro.com/chantix)**

*Please see brief summary of Prescribing Information on last pages of this advertisement.*

# THIS YEAR, HELP THEM KEEP THEIR RESOLUTION

CHANTIX® (varenicline) has been prescribed to more than 11 million patients worldwide\*

**CHANTIX**®

+

GET  Plan

It's more than a prescription.  
It's a plan for quitting.

- You put them on the quitting path. GETQUIT® is on call to help provide smoking cessation follow-up and support

*According to the US Public Health Service*

Your involvement may improve your patients' chances of successfully quitting smoking<sup>1</sup>

**CHANTIX**®  
*(varenicline) TABLETS*

## THE POWER TO HELP THEM QUIT

### IMPORTANT SAFETY INFORMATION

Patients should be informed that there have been reports of serious skin reactions, such as Stevens Johnson Syndrome and Erythema Multiforme and of angioedema, with swelling of the face, mouth and neck that can lead to life-threatening respiratory compromise. Patients should be instructed to discontinue CHANTIX and immediately seek medical care if they experience these symptoms or at the first sign of rash with mucosal lesions or any other signs of hypersensitivity.

The most common adverse reactions include nausea (30%), sleep disturbance, constipation, flatulence, and vomiting. Patients should be informed that they may experience vivid, unusual, or strange dreams during treatment with CHANTIX. Patients should be advised to use caution driving or operating machinery or engaging in other potentially hazardous activities until they know how CHANTIX may affect them.

Safety and efficacy of CHANTIX in combination with other smoking cessation drug therapies have not been studied. Dosage adjustment with CHANTIX is recommended in patients with severe renal impairment or in patients undergoing hemodialysis.

Smoking cessation, with or without treatment with CHANTIX, may alter the pharmacokinetics or pharmacodynamics of some drugs, such as theophylline, warfarin, and insulin. Dosage adjustment for these drugs may be necessary.

\*May 2006 through June 2009. IMS Health. 2009.

**Reference: 1.** Fiore MC, Jaén CR, Baker TB, et al. *Clinical Practice Guideline: Treating Tobacco Use and Dependence: 2008 Update*. Rockville, MD: US Dept of Health and Human Services, Public Health Service; 2008.

## Brief summary of full Prescribing Information.

### CHANTIX® (varenicline) Tablets

#### WARNING:

Serious neuropsychiatric events, including, but not limited to depression, suicidal ideation, suicide attempt and completed suicide have been reported in patients taking CHANTIX. Some reported cases may have been complicated by the symptoms of nicotine withdrawal in patients who stopped smoking. Depressed mood may be a symptom of nicotine withdrawal. Depression, rarely including suicidal ideation, has been reported in smokers undergoing a smoking cessation attempt without medication. However, some of these symptoms have occurred in patients taking CHANTIX who continued to smoke.

All patients being treated with CHANTIX should be observed for neuropsychiatric symptoms including changes in behavior, hostility, agitation, depressed mood, and suicide-related events, including ideation, behavior, and attempted suicide. These symptoms, as well as worsening of pre-existing psychiatric illness and completed suicide have been reported in some patients attempting to quit smoking while taking CHANTIX in the post-marketing experience. When symptoms were reported, most were during CHANTIX treatment, but some were following discontinuation of CHANTIX therapy.

These events have occurred in patients with and without pre-existing psychiatric disease. Patients with serious psychiatric illness such as schizophrenia, bipolar disorder, and major depressive disorder did not participate in the pre-marketing studies of CHANTIX and the safety and efficacy of CHANTIX in such patients has not been established.

**Advise patients and caregivers that the patient should stop taking CHANTIX and contact a healthcare provider immediately if agitation, hostility, depressed mood, or changes in behavior or thinking that are not typical for the patient are observed, or if the patient develops suicidal ideation or suicidal behavior.** In many post-marketing cases, resolution of symptoms after discontinuation of CHANTIX was reported, although in some cases the symptoms persisted; therefore, ongoing monitoring and supportive care should be provided until symptoms resolve.

The risks of CHANTIX should be weighed against the benefits of its use. CHANTIX has been demonstrated to increase the likelihood of abstinence from smoking for as long as one year compared to treatment with placebo. The health benefits of quitting smoking are immediate and substantial.

(See **WARNINGS/Neuropsychiatric Symptoms and Suicidality, PRECAUTIONS/Information for Patients, and ADVERSE REACTIONS/Post-Marketing Experience**)

#### INDICATIONS AND USAGE

CHANTIX is indicated as an aid to smoking cessation treatment.

#### WARNINGS

##### Neuropsychiatric Symptoms and Suicidality

Serious neuropsychiatric symptoms have been reported in patients being treated with CHANTIX (See **Boxed Warning, PRECAUTIONS/Information for patients, and ADVERSE REACTIONS/Post-Marketing Experience**). These post-marketing reports have included changes in mood (including depression and mania), psychosis, hallucinations, paranoia, delusions, homicidal ideation, hostility, agitation, anxiety, and panic, as well as suicidal ideation, suicide attempt, and completed suicide. Some reported cases may have been complicated by the symptoms of nicotine withdrawal in patients who stopped smoking. Depressed mood may be a symptom of nicotine withdrawal. Depression, rarely including suicidal ideation, has been reported in smokers undergoing a smoking cessation attempt without medication. However, some of these symptoms have occurred in patients taking CHANTIX who continued to smoke. When symptoms were reported, most were during CHANTIX treatment, but some were following discontinuation of CHANTIX therapy.

These events have occurred in patients with and without pre-existing psychiatric disease: some patients have experienced worsening of their psychiatric illnesses. All patients being treated with CHANTIX should be observed for neuropsychiatric symptoms or worsening of pre-existing psychiatric illness. Patients with serious psychiatric illness such as schizophrenia, bipolar disorder, and major depressive disorder did not participate in the pre-marketing studies of CHANTIX and the safety and efficacy of CHANTIX in such patients has not been established.

**Advise patients and caregivers that the patient should stop taking CHANTIX and contact a health care provider immediately if agitation, depressed mood, changes in behavior or thinking that are not typical for the patient are observed, or if the patient develops suicidal ideation or suicidal behavior.** In many post-marketing cases, resolution of symptoms after discontinuation of CHANTIX was reported, although in some cases the symptoms persisted, therefore, ongoing monitoring and supportive care should be provided until symptoms resolve.

The risks of CHANTIX should be weighed against the benefits of its use. CHANTIX has been demonstrated to increase the likelihood of abstinence from smoking for as long as one year compared to treatment with placebo. The health benefits of quitting smoking are immediate and substantial.

##### Angioedema and Hypersensitivity Reactions

There have been post-marketing reports of hypersensitivity reactions including angioedema in patients treated with CHANTIX (See **ADVERSE REACTIONS/Post-Marketing Experience**). Clinical signs included swelling of the face, mouth (tongue, lips, and gums), extremities, and neck (throat and larynx). There were infrequent reports of life-threatening angioedema requiring emergency medical attention due to respiratory compromise. Patients should be instructed to discontinue CHANTIX and immediately seek medical care if they experience these symptoms.

##### Serious Skin Reactions

There have been post-marketing reports of rare but serious skin reactions, including Stevens-Johnson Syndrome and Erythema Multiforme in patients using CHANTIX (See **ADVERSE REACTIONS/Post-Marketing Experience**). As these skin reactions can be life-threatening, patients should be instructed to stop taking CHANTIX and contact their healthcare provider immediately at the first appearance of a skin rash with mucosal lesions or any other signs of hypersensitivity.

#### PRECAUTIONS

**General** Nausea was the most common adverse event associated with CHANTIX treatment. Nausea was generally described as mild or moderate and often transient; however, for some subjects, it was persistent over several months. The incidence of nausea was dose-dependent. Initial dose-titration was beneficial in reducing the occurrence of nausea. Nausea was reported by approximately 30% of patients treated with CHANTIX 1 mg BID after an initial week of dose titration. In patients taking CHANTIX 0.5 mg BID, the incidence of nausea was 16% following initial titration. Approximately 3% of subjects treated with CHANTIX 1 mg BID in studies involving 12 weeks of treatment discontinued treatment prematurely because of nausea. For patients with intolerable nausea, dose reduction should be considered.

**Accidental Injury** There have been post-marketing reports of traffic accidents, near-miss incidents in traffic, or other accidental injuries in patients taking CHANTIX. In some cases, the patients reported somnolence, dizziness, loss of consciousness or difficulty concentrating that resulted in impairment, or concern about potential impairment, in driving or operating machinery. Patients should be advised to use caution driving or operating machinery or engaging in other potentially hazardous activities until they know how CHANTIX may affect them.

**Effect of smoking cessation:** Physiological changes resulting from smoking cessation, with or without treatment with CHANTIX, may alter the pharmacokinetics or pharmacodynamics of some drugs, for which dosage adjustment may be necessary (examples include theophylline, warfarin and insulin).

**Drug Interactions** Based on varenicline characteristics and clinical experience to date, CHANTIX has no clinically meaningful pharmacokinetic drug interactions (See **Full Prescribing Information, CLINICAL PHARMACOLOGY, Drug-Drug Interactions**).

**Carcinogenesis, Mutagenesis, Impairment of Fertility** Carcinogenesis. Lifetime carcinogenicity studies were performed in CD-1 mice and Sprague-Dawley rats. There was no evidence of a carcinogenic effect in mice administered varenicline by oral gavage for 2 years at doses up to 20 mg/kg/day (47 times the maximum recommended human daily exposure based on AUC). Rats were administered varenicline (1, 5, and 15 mg/kg/day) by oral gavage for 2 years. In male rats (n = 65 per sex per dose group), incidences of hibernoma (tumor of the brown fat) were increased at the mid dose (1 tumor, 5 mg/kg/day, 23 times the maximum recommended human daily exposure based on AUC) and maximum dose (2 tumors, 15 mg/kg/day, 67 times the maximum recommended human daily exposure based on AUC). The clinical relevance of this finding to humans has not been established. There was no evidence of carcinogenicity in female rats.

Mutagenesis. Varenicline was not genotoxic, with or without metabolic activation, in the following assays: Ames bacterial mutation assay; mammalian CHO/HGPRT assay; and tests for cytogenetic aberrations *in vivo* in rat bone marrow and *in vitro* in human lymphocytes.

Impairment of fertility. There was no evidence of impairment of fertility in either male or female Sprague-Dawley rats administered varenicline succinate up to 15 mg/kg/day (67 and 36 times, respectively, the maximum recommended human daily exposure based on AUC at 1 mg BID). However, a decrease in fertility was noted in the offspring of pregnant rats who were administered varenicline succinate at an oral dose of 15 mg/kg/day (36 times the maximum recommended human daily exposure based on AUC at 1 mg BID). This decrease in fertility in the offspring of treated female rats was not evident at an oral dose of 3 mg/kg/day (9 times the maximum recommended human daily exposure based on AUC at 1 mg BID).

**Pregnancy** Pregnancy Category C. Varenicline succinate was not teratogenic in rats and rabbits at oral doses up to 15 and 30 mg/kg/day, respectively (36 and 50-times the maximum recommended human daily exposure based on AUC at 1 mg BID, respectively). **Nonteratogenic effects** Varenicline succinate has been shown to have an adverse effect on the fetus in animal reproduction studies. Administration of varenicline succinate to pregnant rabbits resulted in reduced fetal weights at an oral dose of 30 mg/kg/day (50 times the human AUC at 1 mg BID); this reduction was not evident following treatment with 10 mg/kg/day (23 times the maximum recommended daily human exposure based on AUC). In addition, in the offspring of pregnant rats treated with varenicline succinate there were decreases in fertility and increases in auditory startle response at an oral dose of 15 mg/kg/day (36 times the maximum recommended human daily exposure based on AUC at 1 mg BID). There are no adequate and well-controlled studies in pregnant women. CHANTIX should be used during pregnancy only if the potential benefit justifies the potential risk to the fetus. **Nursing mothers** Although it is not known whether this drug is excreted in human milk, animal studies have demonstrated that varenicline can be transferred to nursing pups. Because many drugs are excreted in human milk and because of the potential for serious adverse reactions in nursing infants from CHANTIX, a decision should be made whether to discontinue nursing or to discontinue the drug, taking into account the importance of the drug to the mother. **Labor and delivery** The potential effects of CHANTIX on labor and delivery are not known. **Pediatric Use** Safety and

effectiveness of CHANTIX in pediatric patients have not been established; therefore, CHANTIX is not recommended for use in patients under 18 years of age. **Geriatric Use** A combined single and multiple-dose pharmacokinetic study demonstrated that the pharmacokinetics of 1 mg varenicline given QD or BID to 16 healthy elderly male and female smokers (aged 65-75 yrs) for 7 consecutive days was similar to that of younger subjects. No overall differences in safety or effectiveness were observed between these subjects and younger subjects, and other reported clinical experience has not identified differences in responses between the elderly and younger patients, but greater sensitivity of some older individuals cannot be ruled out. Varenicline is known to be substantially excreted by the kidney, and the risk of toxic reactions to this drug may be greater in patients with impaired renal function. Because elderly patients are more likely to have decreased renal function, care should be taken in dose selection, and it may be useful to monitor renal function (see **DOSEAGE AND ADMINISTRATION, Special Populations, Patients with impaired renal function**). No dosage adjustment is recommended for elderly patients (see **DOSEAGE AND ADMINISTRATION, Special Populations**).

#### Information for Patients:

- Patients should be instructed to set a date to quit smoking and to initiate CHANTIX treatment one week before the quit date.
- Patients should be advised that CHANTIX should be taken after eating, and with a full glass of water.
- Patients should be instructed how to titrate CHANTIX, beginning at a dose of 0.5 mg/day. Prescribers should explain that one 0.5 mg tablet should be taken daily for the first three days, and that for the next four days, one 0.5 mg tablet should be taken in the morning and one 0.5 mg tablet should be taken in the evening.
- Patients should be advised that, after the first seven days, the dose should be increased to one 1 mg tablet in the morning and one 1 mg tablet in the evening.
- Patients should be encouraged to continue to attempt to quit if they have early lapses after quit day.
- Patients should also be provided with educational materials and necessary counseling to support an attempt at quitting smoking.
- Patients should be informed that nausea and insomnia are side effects of CHANTIX and are usually transient; however, patients should be advised that if they are persistently troubled by these symptoms, they should notify the prescribing physician so that a dose reduction can be considered.
- Patients should be informed that they may experience vivid, unusual or strange dreams during treatment with CHANTIX.
- Patients should be informed that quitting smoking, with or without CHANTIX, may be associated with nicotine withdrawal symptoms (including depression or agitation) or exacerbation of pre-existing psychiatric illness. Furthermore, some patients have experienced changes in mood (including depression and mania), psychosis, hallucinations, paranoia, delusions, homicidal ideation, aggression, anxiety, and panic, as well as suicidal ideation and suicide when attempting to quit smoking while taking CHANTIX. If patients develop suicidal ideation or behavior, they should be urged to discontinue CHANTIX and report these symptoms to their healthcare provider immediately.
- Patients should be encouraged to reveal any history of psychiatric illness prior to initiating treatment.
- Patients should be informed that some medications may require dose adjustment after quitting smoking.
- Patients intending to become pregnant or planning to breast-feed an infant should be advised of the risks of smoking and risks and benefits of smoking cessation with CHANTIX.
- Patients should be advised to use caution driving or operating machinery until they know how quitting smoking with varenicline may affect them.
- Patients should be informed that there have been reports of angioedema, with swelling of the face, mouth (lip, gum, tongue) and neck (larynx and pharynx) that can lead to life-threatening respiratory compromise. Patients should be instructed to discontinue CHANTIX and immediately seek medical care if they experience these symptoms.
- Patients should be informed that serious skin reactions, such as Stevens Johnson Syndrome and Erythema Multiforme, were reported by some patients taking CHANTIX. They should be advised to stop taking CHANTIX at the first sign of rash with mucosal lesions or skin reaction and contact a health care provider immediately.

#### ADVERSE REACTIONS

During the premarketing development of CHANTIX, over 4500 individuals were exposed to CHANTIX, with over 450 treated for at least 24 weeks and approximately 100 for a year. Most study participants were treated for 12 weeks or less. In Phase 2 and 3 placebo-controlled studies, the treatment discontinuation rate due to adverse events in patients dosed with 1 mg BID was 12% for CHANTIX compared to 10% for placebo in studies of three months' treatment. In this group, the discontinuation rates for the most common adverse events in CHANTIX treated patients were as follows: nausea (3% vs. 0.5% for placebo), headache (0.6% vs. 0.9% for placebo), insomnia (1.2% vs. 1.1% for placebo), and abnormal dreams (0.3% vs. 0.2% for placebo). Adverse Events were categorized using the Medical Dictionary for Regulatory Activities (MedDRA, Version 7.1).

The most common adverse events associated with CHANTIX (>5% and twice the rate seen in placebo-treated patients) were nausea, sleep disturbance, constipation, flatulence, and vomiting. Smoking cessation, with or without treatment, is associated with nicotine withdrawal symptoms.

The most common adverse event associated with CHANTIX treatment is nausea. For patients treated to the maximum recommended dose of 1 mg BID following initial dosage titration, the incidence of nausea was 30% compared with 10% in patients taking a comparable placebo regimen. In patients taking CHANTIX 0.5 mg BID following initial titration, the incidence was 16% compared with 11% for placebo. Nausea was generally described as mild or moderate and often transient; however, for some subjects, it was persistent throughout the treatment period.

Table 3 shows the adverse events for CHANTIX and placebo in the 12 week fixed dose studies with titration in the first week (Studies 2 (titrated arm only), 4, and 5). MedDRA High Level Group Terms (HLGT) reported in ≥ 5% of patients in the CHANTIX 1 mg BID dose group, and more commonly than in the placebo group, are listed, along with subordinate Preferred Terms (PT) reported in ≥ 1% of CHANTIX patients, (at least 0.5% more frequent than placebo). Closely related Preferred Terms such as 'insomnia', 'initial insomnia', 'middle insomnia', 'Early morning awakenings' were grouped, but individual patients reporting two or more grouped events are only counted once.

**Table 3: Common Treatment Emergent AEs (%) in the Fixed-Dose, Placebo-Controlled Studies (≥ 1% in the 1 mg BID CHANTIX Group, and 1 mg BID CHANTIX at least 0.5% more than Placebo)**

| SYSTEM ORGAN CLASS<br>High Level Group Term<br>Preferred Term | CHANTIX<br>0.5 mg BID<br>N=129 | CHANTIX<br>1mg BID<br>N=821 | Placebo<br>N=805 |
|---------------------------------------------------------------|--------------------------------|-----------------------------|------------------|
| <b>GASTROINTESTINAL</b>                                       |                                |                             |                  |
| GI Signs and Symptoms                                         |                                |                             |                  |
| Nausea                                                        | 16                             | 30                          | 10               |
| Abdominal Pain*                                               | 5                              | 7                           | 5                |
| Flatulence                                                    | 9                              | 6                           | 3                |
| Dyspepsia                                                     | 5                              | 5                           | 3                |
| Vomiting                                                      | 1                              | 5                           | 2                |
| GI Motility/Defecation Conditions                             |                                |                             |                  |
| Constipation                                                  | 5                              | 8                           | 3                |
| Gastroesophageal reflux disease                               | 1                              | 0                           | 0                |
| Salivary Gland Conditions                                     |                                |                             |                  |
| Dry mouth                                                     | 4                              | 6                           | 4                |
| <b>PSYCHIATRIC DISORDERS</b>                                  |                                |                             |                  |
| Sleep Disorders/Disturbances                                  |                                |                             |                  |
| Insomnia**                                                    | 19                             | 18                          | 13               |
| Abnormal dreams                                               | 9                              | 13                          | 5                |
| Sleep disorder                                                | 2                              | 5                           | 3                |
| Nightmare                                                     | 2                              | 1                           | 0                |
| <b>NERVOUS SYSTEM</b>                                         |                                |                             |                  |
| Headaches                                                     |                                |                             |                  |
| Headache                                                      | 19                             | 15                          | 13               |
| Neurological Disorders NEC                                    |                                |                             |                  |
| Dysgeusia                                                     | 8                              | 5                           | 4                |
| Somnolence                                                    | 3                              | 3                           | 2                |
| Lethargy                                                      | 2                              | 1                           | 0                |
| <b>GENERAL DISORDERS</b>                                      |                                |                             |                  |
| General Disorders NEC                                         |                                |                             |                  |
| Fatigue/Malaise/Asthenia                                      | 4                              | 7                           | 6                |
| <b>RESPIRATORY/THORACIC/MEDIAST</b>                           |                                |                             |                  |
| Respiratory Disorders NEC                                     |                                |                             |                  |
| Rhinorrhea                                                    | 0                              | 1                           | 0                |
| Dyspnoea                                                      | 2                              | 1                           | 1                |
| Upper Respiratory Tract Disorder                              | 7                              | 5                           | 4                |
| <b>SKIN/SUBCUTANEOUS TISSUE</b>                               |                                |                             |                  |
| Epidermal and Dermal Conditions                               |                                |                             |                  |
| Rash                                                          | 1                              | 3                           | 2                |
| Pruritis                                                      | 0                              | 1                           | 1                |
| <b>METABOLISM &amp; NUTRITION</b>                             |                                |                             |                  |
| Appetite/General Nutr. Disorders                              |                                |                             |                  |
| Increased appetite                                            | 4                              | 3                           | 2                |
| Decreased appetite/Anorexia                                   | 1                              | 2                           | 1                |

\* Includes PTs Abdominal (pain, pain upper, pain lower, discomfort, tenderness, distension) and Stomach discomfort

\*\* Includes PTs Insomnia/Initial insomnia/Middle insomnia/Early morning awakening

The overall pattern, and the frequency of adverse events during the longer-term trials was very similar to that described in Table 3.

though several of the most common events were reported by a greater proportion of patients. Nausea, for instance, was reported in 40% of patients treated with CHANTIX 1 mg BID in a one-year study, compared to 8% of placebo-treated patients.

Following is a list of treatment-emergent adverse events reported by patients treated with CHANTIX during all clinical trials. The listing does not include those events already listed in the previous labels or elsewhere in labeling, those events for which a drug cause was remote, those events which were so general as to be uninformative, and those events reported only once which did not have a substantial probability of being acutely life-threatening. **BLOOD AND LYMPHATIC SYSTEM DISORDERS.** *Infrequent:* Anemia, Lymphadenopathy. *Rare:* Leukocytosis, Thrombocytopenia, Splenomegaly. **CARDIAC DISORDERS.** *Infrequent:* Angina pectoris, Arrhythmia, Bradycardia, Ventricular extrasystoles, Myocardial infarction, Palpitations, Tachycardia. *Rare:* Atrial fibrillation, Cardiac flutter, Coronary artery disease, Cor pulmonale, Acute coronary syndrome. **EAR AND LABYRINTH DISORDERS.** *Infrequent:* Tinnitus, Vertigo. *Rare:* Deafness, Meniere's disease. **ENDOCRINE DISORDERS.** *Infrequent:* Thyroid gland disorders. **EYE DISORDERS.** *Infrequent:* Conjunctivitis, Dry eye, Eye irritation, Vision blurred, Visual disturbance, Eye pain. *Rare:* Acquired night blindness, Blindness transient, Cataract subcapsular, Ocular vascular disorder, Phosphoria, Vitreous floaters. **GASTROINTESTINAL DISORDERS.** *Frequent:* Diarrhea, Gingivitis. *Infrequent:* Dysphagia, Enterocolitis, Erection, Gastritis, Gastrointestinal hemorrhage, Mouth ulceration, Esophagitis. *Rare:* Gastric ulcer, Intestinal obstruction, Pancreatitis acute. **GENERAL DISORDERS AND ADMINISTRATION SITE CONDITIONS.** *Frequent:* Chest pain, Influenza like illness, Edema, Thirst. *Infrequent:* Chest discomfort, Chills, Pirexia. **HEPATOBIILIARY DISORDERS.** *Infrequent:* Gall bladder disorder. **IMMUNE SYSTEM DISORDERS.** *Infrequent:* Hypersensitivity. *Rare:* Drug hypersensitivity. **INVESTIGATIONS.** *Frequent:* Liver function test abnormal. **METABOLISM AND NUTRITION DISORDERS.** *Infrequent:* Diabetes mellitus, Hyperlipidemia, Hypokalemia. *Rare:* Hyperkalemia, Hypoglycemia. **MUSCULOSKELETAL AND CONNECTIVE TISSUE DISORDERS.** *Frequent:* Arthralgia, Back pain, Muscle cramp, Musculoskeletal pain, Myalgia. *Infrequent:* Arthritis, Osteoporosis. *Rare:* Myositis. **NERVOUS SYSTEM DISORDERS.** *Frequent:* Disturbance in attention, Dizziness, Sensory disturbance. *Infrequent:* Amnesia, Migraine, Parasomnia, Psychomotor hyperactivity, Restless legs syndrome, Syncope, Tremor. *Rare:* Balance disorder, Cerebrovascular accident, Convulsion, Dysarthria, Facial palsy, Mental impairment, Multiple sclerosis, Nystagmus, Psychomotor skills impaired, Transient ischemic attack, Visual field defect. **PSYCHIATRIC DISORDERS.** *Frequent:* Anxiety, Depression, Emotional disorder, Irritability, Restlessness. *Infrequent:* Aggression, Agitation, Disorientation, Dissociation, Libido decreased, Mood swings, Thinking abnormal. *Rare:* Bradyphrenia, Euphoric mood, Hallucination, Psychotic disorder, Suicidal ideation. **RENAL AND URINARY DISORDERS.** *Frequent:* Polyuria. *Infrequent:* Nephrolithiasis, Nocturia, Urine abnormality, Urethral syndrome. *Rare:* Renal failure acute, Urinary retention. **REPRODUCTIVE SYSTEM AND BREAST DISORDERS.** *Frequent:* Menstrual disorder. *Infrequent:* Erectile dysfunction. *Rare:* Sexual dysfunction. **RESPIRATORY, THORACIC AND MEDIASTINAL DISORDERS.** *Frequent:* Epistaxis, Respiratory disorders. *Infrequent:* Asthma. *Rare:* Pleurisy, Pulmonary embolism. **SKIN AND SUBCUTANEOUS TISSUE DISORDERS.** *Frequent:* Hyperhidrosis. *Infrequent:* Acne, Dermatitis, Dry skin, Eczema, Erythema, Psoriasis, Urticaria. *Rare:* Photosensitivity reaction. **VASCULAR DISORDERS.** *Frequent:* Hot flush, Hypertension. *Infrequent:* Hypotension, Peripheral ischemia, Thrombosis.

**Post-Marketing Experience:**

The following adverse events have been reported during post-approval use of CHANTIX. Because these events are reported voluntarily from a population of uncertain size, it is not possible to reliably estimate their frequency or establish a causal relationship to drug exposure. There have been reports of depression, mania, psychosis, hallucinations, paranoia, delusions, homicidal ideation, aggression, hostility, anxiety, and panic, as well as suicidal ideation, suicide attempt, and completed suicide in patients attempting to quit smoking while taking CHANTIX (See **Boxed Warning, WARNINGS/Neuropsychiatric Symptoms and Suicidality, PRECAUTIONS/Information for Patients**). Smoking cessation with or without treatment is associated with nicotine withdrawal symptoms and the exacerbation of underlying psychiatric illness. Not all patients had known pre-existing psychiatric illness and not all had discontinued smoking.

There have been reports of hypersensitivity reactions, including angioedema (See **WARNINGS and PRECAUTIONS**).

There have also been reports of serious skin reactions, including Stevens Johnson Syndrome and Erythema Multiforme in patients taking CHANTIX (See **WARNINGS and PRECAUTIONS**).

**DRUG ABUSE AND DEPENDENCE**

**Controlled Substance Class** Varenicline is not a controlled substance. **Humans:** Fewer than 1 out of 1000 patients reported euphoria in clinical trials with CHANTIX. At higher doses (greater than 2 mg), CHANTIX produced more frequent reports of gastrointestinal disturbances such as nausea and vomiting. There is no evidence of dose-escalation to maintain therapeutic effects in clinical studies, which suggests that tolerance does not develop. Abrupt discontinuation of CHANTIX was associated with an increase in irritability and sleep disturbances in up to 3% of patients. This suggests that, in some patients, varenicline may produce mild physical dependence which is not associated with addiction. In a human laboratory abuse liability study, a single oral dose of 1 mg varenicline did not produce any significant positive or negative subjective responses in smokers. In non-smokers, 1 mg varenicline produced an increase in some positive subjective effects, but this was accompanied by an increase in negative adverse effects, especially nausea. A single oral dose

of 3 mg varenicline uniformly produced unpleasant subjective responses in both smokers and non-smokers. **Animals:** Studies in rodents have shown that varenicline produces behavioral responses similar to those produced by nicotine. In rats trained to discriminate nicotine from saline, varenicline produced full generalization to the nicotine cue. In self-administration studies, the degree to which varenicline substitutes for nicotine is dependent upon the requirement of the task. Rats trained to self-administer nicotine under easy conditions continued to self-administer varenicline to a degree comparable to that of nicotine, however in a more demanding task, rats self-administered varenicline to a lesser extent than nicotine. Varenicline pretreatment also reduced nicotine self-administration.

**OVERDOSAGE**

In case of overdose, standard supportive measures should be instituted as required. Varenicline has been shown to be dialyzed in patients with end stage renal disease (see **CLINICAL PHARMACOLOGY, Pharmacokinetics, Pharmacokinetics in Special Patient Populations**), however, there is no experience in dialysis following overdose.

**DOSAGE AND ADMINISTRATION**

**Usual Dosage for Adults** Smoking cessation therapies are more likely to succeed for patients who are motivated to stop smoking and who are provided additional advice and support. Patients should be provided with appropriate educational materials and counseling to support the quit attempt. The patient should set a date to stop smoking. CHANTIX dosing should start one week before this date. CHANTIX should be taken after eating and with a full glass of water. The recommended dose of CHANTIX is 1 mg twice daily following a 1-week titration as follows:

|                          |                    |
|--------------------------|--------------------|
| Days 1–3:                | 0.5 mg once daily  |
| Days 4–7:                | 0.5 mg twice daily |
| Days 8–End of treatment: | 1 mg twice daily   |

Patients who cannot tolerate adverse effects of CHANTIX may have the dose lowered temporarily or permanently. Patients should be treated with CHANTIX for 12 weeks. For patients who have successfully stopped smoking at the end of 12 weeks, an additional course of 12 weeks treatment with CHANTIX is recommended to further increase the likelihood of long-term abstinence. Patients who do not succeed in stopping smoking during 12 weeks of initial therapy, or who relapse after treatment, should be encouraged to make another attempt once factors contributing to the failed attempt have been identified and addressed.

**Special Populations**

**Patients with impaired renal function** No dosage adjustment is necessary for patients with mild to moderate renal impairment. For patients with severe renal impairment, the recommended starting dose of CHANTIX is 0.5 mg once daily. Patients may then titrate as needed to a maximum dose of 0.5 mg twice a day. For patients with end-stage renal disease undergoing hemodialysis, a maximum dose of 0.5 mg once daily may be administered if tolerated well (See **CLINICAL PHARMACOLOGY, Pharmacokinetics, Pharmacokinetics in Special Populations, Renal Impairment**).

**Dosing in elderly patients and patients with impaired hepatic function** No dosage adjustment is necessary for patients with hepatic impairment. Because elderly patients are more likely to have decreased renal function, care should be taken in dose selection, and it may be useful to monitor renal function (See **PRECAUTIONS, Geriatric Use**).

**Use in children** Safety and effectiveness of CHANTIX in pediatric patients have not been established; therefore, CHANTIX is not recommended for use in patients under 18 years of age.

Please see CHANTIX full Prescribing Information and patient Medication Guide at [www.pfizerpro.com/chantix](http://www.pfizerpro.com/chantix).

Rx only

July 2009, Version 4.0

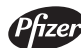

VCP00686 © 2009 Pfizer Inc. All rights reserved. Printed in USA/December 2009

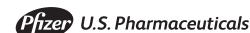

Save the Date!  
163rd ANNUAL MEETING  
**AMERICAN PSYCHIATRIC ASSOCIATION**  
May 22-26, 2010

Join us for the premier scientific meeting of the year in the unique, historic destination of New Orleans.

- Earn AMA PRA Category 1 Credit™.
- Listen to world-renowned speakers.
- Attend state-of-the-art clinical practice updates and review cutting-edge science.
- Participate in the popular 'Advances in...' series.
- Attend the Frontiers in Science and Distinguished Psychiatrists lectures.
- Save and order the 2010 Annual Meeting Online and DVD highlights at exclusive attendee prices.
- Experience an exciting city rich in architecture, living history, traditions, and customs.

**Register Now!** [www.psych.org](http://www.psych.org)

NEW ORLEANS, LA  
MAY 22-26, 2010  
PRIDE & PROMISE:  
TOWARD A NEW  
PSYCHIATRY  
163rd ANNUAL MEETING  
AMERICAN PSYCHIATRIC ASSOCIATION

**Osler Institute 141<sup>st</sup> to 144<sup>th</sup>**  
**Psychiatry Review Courses**  
*approved for AMA/PRA category 1 credit*

**for Written Exams**  
January 19-22, 2010 – Houston  
April 28-May 1 – Philadelphia

**for Oral Boards**  
1-day oral didactic day  
January 18 – Houston  
May 3 – Philadelphia  
3-day mock oral exams  
January 19-21 – Houston  
May 4-6, 2010 – Philadelphia

**for Recertification**  
January 16-17, 2010 – Houston

**New – Best of Psych Audio**  
**Call Today: (800) 356-7537**  
**www.osler.org**

Y9Z

**Fanapt Ad**



# Yesterday...

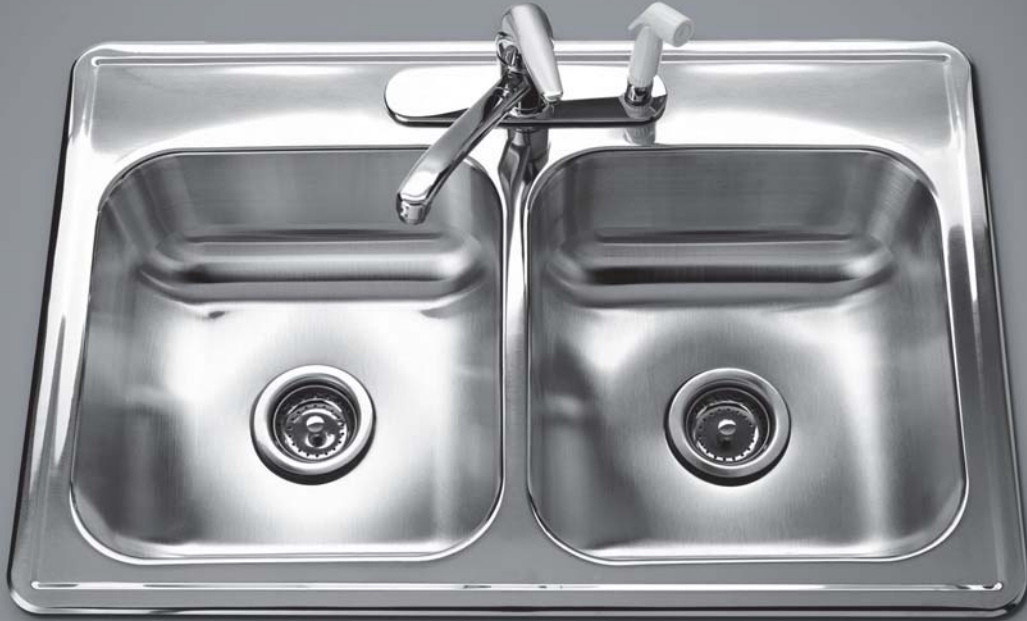

## IMPORTANT SAFETY INFORMATION FOR INVEGA®

### **WARNING: Increased Mortality in Elderly Patients with Dementia-Related Psychosis**

**Elderly patients with dementia-related psychosis treated with antipsychotic drugs are at an increased risk of death. Analyses of 17 placebo-controlled trials (modal duration of 10 weeks), largely in patients taking atypical antipsychotic drugs, revealed a risk of death in the drug-treated patients of between 1.6 to 1.7 times the risk of death in placebo-treated patients. Over the course of a typical 10-week controlled trial, the rate of death in drug-treated patients was about 4.5%, compared to a rate of about 2.6% in the placebo group. Although the causes of death were varied, most of the deaths appeared to be either cardiovascular (e.g., heart failure, sudden death) or infectious (e.g., pneumonia) in nature. Observational studies suggest that, similar to atypical antipsychotic drugs, treatment with conventional antipsychotic drugs may increase mortality. The extent to which the findings of increased mortality in observational studies may be attributed to the antipsychotic drug as opposed to some characteristic(s) of the patients is not clear. INVEGA® (paliperidone) is not approved for the treatment of patients with dementia-related psychosis.**

**Hypersensitivity:** Hypersensitivity reactions, including anaphylactic reactions and angioedema, have been observed in patients treated with risperidone and paliperidone, which is a metabolite of risperidone, therefore paliperidone is contraindicated in patients with a known hypersensitivity to either paliperidone or risperidone, or to any of the excipients in INVEGA®.

**Cerebrovascular Adverse Events (CAEs):** CAEs, including fatalities and stroke, have been reported in elderly patients with dementia-related psychosis taking oral risperidone in clinical trials. The incidence of CAEs with risperidone was significantly higher than with placebo. INVEGA® is not approved for the treatment of patients with dementia-related psychosis.

**Neuroleptic Malignant Syndrome (NMS):** NMS, a potentially fatal symptom complex, has been reported with the use of antipsychotic medications, including paliperidone. Clinical manifestations include muscle rigidity, fever, altered mental status and evidence of autonomic instability (see full Prescribing Information). Management should include immediate discontinuation of antipsychotic drugs and other drugs not essential to concurrent therapy, intensive symptomatic treatment and close medical monitoring, and treatment of any concomitant serious medical problems.

**QT Prolongation:** Paliperidone causes a modest increase in the corrected QT (QTc) interval. Avoid the use of drugs that also increase QT interval and in patients with risk factors for prolonged QT interval. Paliperidone should also be avoided in patients with congenital long QT syndrome and in patients with a history of cardiac arrhythmias. Certain circumstances may increase the risk of the occurrence of torsade de pointes and/or sudden death in association with the use of drugs that prolong the QTc interval.

**Tardive Dyskinesia (TD):** TD is a syndrome of potentially irreversible, involuntary, dyskinetic movements that may develop in patients treated with antipsychotic medications. The risk of developing TD and the likelihood that dyskinetic movements will become irreversible are believed to increase with duration of treatment and total cumulative dose, but can develop after relatively brief treatment at low doses. Elderly women patients appeared to be at increased risk for TD, although it is impossible to predict which patients will develop the syndrome. Prescribing should be consistent with the need to minimize the risk of TD. Discontinue drug if clinically appropriate. The syndrome may remit, partially or completely, if antipsychotic treatment is withdrawn.

**Hyperglycemia and Diabetes:** Hyperglycemia, some cases extreme and associated with ketoacidosis, hyperosmolar coma or death has been reported in patients treated with atypical antipsychotics (APS), including INVEGA®. Patients starting treatment with APS who have or

# Today.

## Announcing the only approved acute treatment for schizoaffective disorder\*<sup>1</sup>

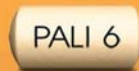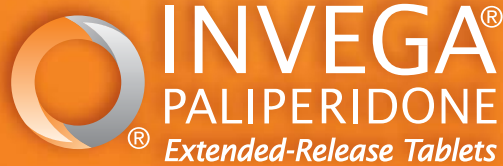

Tablet shown not actual size.

[www.INVEGA360.com](http://www.INVEGA360.com)

are at risk for diabetes should undergo fasting blood glucose testing at the beginning of and during treatment. Patients who develop symptoms of hyperglycemia should also undergo fasting blood glucose testing. Some patients require continuation of anti-diabetic treatment despite discontinuation of the suspect drug.

**Hyperprolactinemia:** As with other drugs that antagonize dopamine D<sub>2</sub> receptors, INVEGA® elevates prolactin levels and the elevation persists during chronic administration. Paliperidone has a prolactin-elevating effect similar to risperidone, which is associated with higher levels of prolactin elevation than other antipsychotic agents.

**Orthostatic Hypotension and Syncope:** INVEGA® may induce orthostatic hypotension associated with dizziness, tachycardia, and in some patients, syncope, especially during the initial dose-titration period. Monitoring should be considered in patients for whom this may be of concern. INVEGA® should be used with caution in patients with known cardiovascular disease, cerebrovascular disease or conditions that would predispose patients to hypotension.

**Leukopenia, Neutropenia and Agranulocytosis** have been reported with antipsychotics, including paliperidone. Patients with a history of clinically significant low white blood cell count (WBC) or drug-induced leukopenia/neutropenia should have frequent complete blood cell counts during the first few months of therapy. At the first sign of a decline in WBC and in the absence of other causative factors, discontinuation of INVEGA® should be considered. Patients with clinically significant neutropenia should be carefully monitored for fever or other symptoms

or signs of infection and treated promptly if such symptoms or signs occur. Patients with severe neutropenia (absolute neutrophil count <1000/mm<sup>3</sup>) should discontinue INVEGA® and have their WBC followed until recovery.

**Potential for Cognitive and Motor Impairment:** Somnolence, sedation, and dizziness were reported as adverse reactions in subjects treated with INVEGA®. INVEGA® has the potential to impair judgment, thinking, or motor skills. Patients should be cautioned about operating hazardous machinery, including motor vehicles, until they are reasonably certain that INVEGA® does not affect them adversely, and should use caution when operating machinery.

**Seizures:** INVEGA® should be used cautiously in patients with a history of seizures or with conditions that potentially lower seizure threshold.

**Suicide:** The possibility of suicide attempt is inherent in schizophrenia. Close supervision of high-risk patients should accompany drug therapy.

**Maintenance Treatment:** Physicians who elect to use INVEGA® for extended periods should periodically re-evaluate the long-term risks and benefits of the drug for the individual patient.

**Commonly Observed Adverse Reactions:** The most commonly observed adverse reactions in clinical trials occurring at an incidence of ≥5% and at least 2 times placebo were: schizophrenia—extrapyramidal symptoms, tachycardia, and akathisia; schizoaffective disorder—extrapyramidal symptoms, somnolence, dyspepsia, constipation, weight increased, and nasopharyngitis.

**Reference: 1.** US Food and Drug Administration. Drugs@FDA Web site. <http://www.accessdata.fda.gov/scripts/cder/drugsatfda/index.cfm>. Accessed September 24, 2009.

Please see brief summary of full Prescribing Information for INVEGA® on adjacent page.

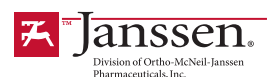

# INVEGA®

(paliperidone) Extended-Release Tablets

## Brief Summary

**BEFORE PRESCRIBING INVEGA®, PLEASE SEE FULL PRESCRIBING INFORMATION, INCLUDING BOXED WARNING.**

### WARNING: INCREASED MORTALITY IN ELDERLY PATIENTS WITH DEMENTIA-RELATED PSYCHOSIS

Elderly patients with dementia-related psychosis treated with antipsychotic drugs are at an increased risk of death. Analyses of 17 placebo-controlled trials (modal duration of 10 weeks), largely in patients taking atypical antipsychotic drugs, revealed a risk of death in drug-treated patients of between 1.6 to 1.7 times the risk of death in placebo-treated patients. Over the course of a typical 10-week controlled trial, the rate of death in drug-treated patients was about 4.5%, compared to a rate of about 2.6% in the placebo group. Although the causes of death were varied, most of the deaths appeared to be either cardiovascular (e.g., heart failure, sudden death) or infectious (e.g., pneumonia) in nature. Observational studies suggest that, similar to atypical antipsychotic drugs, treatment with conventional antipsychotic drugs may increase mortality. The extent to which the findings of increased mortality in observational studies may be attributed to the antipsychotic drug as opposed to some characteristic(s) of the patients is not clear. **INVEGA® (paliperidone) Extended-Release Tablets is not approved for the treatment of patients with dementia-related psychosis. [see Warnings and Precautions]**

INVEGA® (paliperidone) Extended-Release Tablets are indicated for the acute and maintenance treatment of schizophrenia [see Clinical Studies (14) in full PI].

## CONTRAINDICATIONS

Hypersensitivity reactions, including anaphylactic reactions and angioedema, have been observed in patients treated with risperidone and paliperidone. INVEGA® (paliperidone) is a metabolite of risperidone and is therefore contraindicated in patients with a known hypersensitivity to either paliperidone or risperidone, or to any of the excipients in INVEGA®.

## WARNINGS AND PRECAUTIONS

**Increased Mortality in Elderly Patients with Dementia-Related Psychosis: Elderly patients with dementia-related psychosis treated with antipsychotic drugs are at an increased risk of death. INVEGA® (paliperidone) is not approved for the treatment of dementia-related psychosis [see Boxed Warning].**

**Cerebrovascular Adverse Reactions, Including Stroke, in Elderly Patients With Dementia-Related Psychosis:** In placebo-controlled trials with risperidone, aripiprazole, and olanzapine in elderly subjects with dementia, there was a higher incidence of cerebrovascular adverse reactions (cerebrovascular accidents and transient ischemic attacks) including fatalities compared to placebo-treated subjects. INVEGA® was not marketed at the time these studies were performed. INVEGA® is not approved for the treatment of patients with dementia-related psychosis [see also Boxed Warning and Warnings and Precautions].

**Neuroleptic Malignant Syndrome:** A potentially fatal symptom complex sometimes referred to as Neuroleptic Malignant Syndrome (NMS) has been reported in association with antipsychotic drugs, including paliperidone. Clinical manifestations of NMS are hyperpyrexia, muscle rigidity, altered mental status, and evidence of autonomic instability (irregular pulse or blood pressure, tachycardia, diaphoresis, and cardiac dysrhythmia). Additional signs may include elevated creatine phosphokinase, myoglobinuria (rhabdomyolysis), and acute renal failure.

The diagnostic evaluation of patients with this syndrome is complicated. In arriving at a diagnosis, it is important to identify cases in which the clinical presentation includes both serious medical illness (e.g., pneumonia, systemic infection, etc.) and untreated or inadequately treated extrapyramidal signs and symptoms (EPS). Other important considerations in the differential diagnosis include central anticholinergic toxicity, heat stroke, drug fever, and primary central nervous system pathology.

The management of NMS should include: (1) immediate discontinuation of antipsychotic drugs and other drugs not essential to concurrent therapy; (2) intensive symptomatic treatment and medical monitoring; and (3) treatment of any concomitant serious medical problems for which specific treatments are available. There is no general agreement about specific pharmacological treatment regimens for uncomplicated NMS.

If a patient appears to require antipsychotic drug treatment after recovery from NMS, reintroduction of drug therapy should be closely monitored, since recurrences of NMS have been reported.

**QT Prolongation:** Paliperidone causes a modest increase in the corrected QT (QTc) interval. The use of paliperidone should be avoided in combination with other drugs that are known to prolong QTc including Class 1A (e.g., quinidine, procainamide) or Class III (e.g., amiodarone, sotalol) antiarrhythmic medications, antipsychotic medications (e.g., chlorpromazine, thioridazine), antibiotics (e.g., gatifloxacin, moxifloxacin), or any other class of medications known to prolong the QTc interval. Paliperidone should also be avoided in patients with congenital long QT syndrome and in patients with a history of cardiac arrhythmias.

Certain circumstances may increase the risk of the occurrence of torsade de pointes and/or sudden death in association with the use of drugs that prolong the QTc interval, including (1) bradycardia; (2) hypokalemia or hypomagnesemia; (3) concomitant use of other drugs that prolong the QTc interval; and (4) presence of congenital prolongation of the QT interval.

The effects of paliperidone on the QT interval were evaluated in a double-blind, active-controlled (moxifloxacin 400 mg single dose), multicenter QT study in adults

## INVEGA® (paliperidone) Extended-Release Tablets

with schizophrenia and schizoaffective disorder, and in three placebo- and active-controlled 6-week, fixed-dose efficacy trials in adults with schizophrenia.

In the QT study (n = 141), the 8 mg dose of immediate-release oral paliperidone (n=50) showed a mean placebo-subtracted increase from baseline in QTcLD of 12.3 msec (90% CI: 8.9; 15.6) on day 8 at 1.5 hours post-dose. The mean steady-state peak plasma concentration for this 8 mg dose of paliperidone immediate-release was more than twice the exposure observed with the maximum recommended 12 mg dose of INVEGA® (C<sub>max</sub> ss = 113 ng/mL and 45 ng/mL, respectively, when administered with a standard breakfast). In this same study, a 4 mg dose of the immediate-release oral formulation of paliperidone, for which C<sub>max</sub> ss = 35 ng/mL, showed an increased placebo-subtracted QTcLD of 6.8 msec (90% CI: 3.6; 10.1) on day 2 at 1.5 hours post-dose. None of the subjects had a change exceeding 60 msec or a QTcLD exceeding 500 msec at any time during this study.

For the three fixed-dose efficacy studies in subjects with schizophrenia, electrocardiogram (ECG) measurements taken at various time points showed only one subject in the INVEGA® 12 mg group had a change exceeding 60 msec at one time-point on Day 6 (increase of 62 msec). No subject receiving INVEGA® had a QTcLD exceeding 500 msec at any time in any of these three studies.

**Tardive Dyskinesia:** A syndrome of potentially irreversible, involuntary, dyskinetic movements may develop in patients treated with antipsychotic drugs. Although the prevalence of the syndrome appears to be highest among the elderly, especially elderly women, it is impossible to predict which patients will develop the syndrome. Whether antipsychotic drug products differ in their potential to cause tardive dyskinesia is unknown.

The risk of developing tardive dyskinesia and the likelihood that it will become irreversible appear to increase as the duration of treatment and the total cumulative dose of antipsychotic drugs administered to the patient increase, but the syndrome can develop after relatively brief treatment periods at low doses, although this is uncommon.

There is no known treatment for established tardive dyskinesia, although the syndrome may remit, partially or completely, if antipsychotic treatment is withdrawn. Antipsychotic treatment itself may suppress (or partially suppress) the signs and symptoms of the syndrome and may thus mask the underlying process. The effect of symptomatic suppression on the long-term course of the syndrome is unknown.

Given these considerations, INVEGA® should be prescribed in a manner that is most likely to minimize the occurrence of tardive dyskinesia. Chronic antipsychotic treatment should generally be reserved for patients who suffer from a chronic illness that is known to respond to antipsychotic drugs. In patients who do require chronic treatment, the smallest dose and the shortest duration of treatment producing a satisfactory clinical response should be sought. The need for continued treatment should be reassessed periodically.

If signs and symptoms of tardive dyskinesia appear in a patient treated with INVEGA®, drug discontinuation should be considered. However, some patients may require treatment with INVEGA® despite the presence of the syndrome.

**Hyperglycemia and Diabetes Mellitus:** Hyperglycemia, in some cases extreme and associated with ketoacidosis or hyperosmolar coma or death, has been reported in patients treated with all atypical antipsychotics. These cases were, for the most part, seen in post-marketing clinical use and epidemiologic studies, not in clinical trials, and there have been few reports of hyperglycemia or diabetes in trial subjects treated with INVEGA®. Assessment of the relationship between atypical antipsychotic use and glucose abnormalities is complicated by the possibility of an increased background risk of diabetes mellitus in patients with schizophrenia and the increasing incidence of diabetes mellitus in the general population. Given these confounders, the relationship between atypical antipsychotic use and hyperglycemia-related adverse events is not completely understood. However, epidemiological studies suggest an increased risk of treatment-emergent hyperglycemia-related adverse events in patients treated with the atypical antipsychotics. Because INVEGA® was not marketed at the time these studies were performed, it is not known if INVEGA® is associated with this increased risk.

Patients with an established diagnosis of diabetes mellitus who are started on atypical antipsychotics should be monitored regularly for worsening of glucose control. Patients with risk factors for diabetes mellitus (e.g., obesity, family history of diabetes) who are starting treatment with atypical antipsychotics should undergo fasting blood glucose testing at the beginning of treatment and periodically during treatment. Any patient treated with atypical antipsychotics should be monitored for symptoms of hyperglycemia including polydipsia, polyuria, polyphagia, and weakness. Patients who develop symptoms of hyperglycemia during treatment with atypical antipsychotics should undergo fasting blood glucose testing. In some cases, hyperglycemia has resolved when the atypical antipsychotic was discontinued; however, some patients required continuation of anti-diabetic treatment despite discontinuation of the suspect drug.

**Hyperprolactinemia:** Like other drugs that antagonize dopamine D<sub>2</sub> receptors, paliperidone elevates prolactin levels and the elevation persists during chronic administration. Paliperidone has a prolactin-elevating effect similar to that seen with risperidone, a drug that is associated with higher levels of prolactin than other antipsychotic drugs.

Hyperprolactinemia, regardless of etiology, may suppress hypothalamic GnRH, resulting in reduced pituitary gonadotrophin secretion. This, in turn, may inhibit reproductive function by impairing gonadal steroidogenesis in both female and male patients. Galactorrhea, amenorrhea, gynecomastia, and impotence have been reported in patients receiving prolactin-elevating compounds. Long-standing

hyperprolactinemia when associated with hypogonadism may lead to decreased bone density in both female and male subjects.

Tissue culture experiments indicate that approximately one-third of human breast cancers are prolactin dependent *in vitro*, a factor of potential importance if the prescription of these drugs is considered in a patient with previously detected breast cancer. An increase in the incidence of pituitary gland, mammary gland, and pancreatic islet cell neoplasia (mammary adenocarcinomas, pituitary and pancreatic adenomas) was observed in the risperidone carcinogenicity studies conducted in mice and rats [see *Nonclinical Toxicology (13.1) in full PI*]. Neither clinical studies nor epidemiologic studies conducted to date have shown an association between chronic administration of this class of drugs and tumorigenesis in humans, but the available evidence is too limited to be conclusive.

**Potential for Gastrointestinal Obstruction:** Because the INVEGA® tablet is non-deformable and does not appreciably change in shape in the gastrointestinal tract, INVEGA® should ordinarily not be administered to patients with pre-existing severe gastrointestinal narrowing (pathologic or iatrogenic, for example: esophageal motility disorders, small bowel inflammatory disease, "short gut" syndrome due to adhesions or decreased transit time, past history of peritonitis, cystic fibrosis, chronic intestinal pseudoobstruction, or Meckel's diverticulum). There have been rare reports of obstructive symptoms in patients with known strictures in association with the ingestion of drugs in non-deformable controlled-release formulations. Because of the controlled-release design of the tablet, INVEGA® should only be used in patients who are able to swallow the tablet whole [see *Dosage and Administration (2.3) and Patient Counseling Information (17.8) in full PI*].

A decrease in transit time, e.g., as seen with diarrhea, would be expected to decrease bioavailability and an increase in transit time, e.g., as seen with gastrointestinal neuropathy, diabetic gastroparesis, or other causes, would be expected to increase bioavailability. These changes in bioavailability are more likely when the changes in transit time occur in the upper GI tract.

**Orthostatic Hypotension and Syncope:** Paliperidone can induce orthostatic hypotension and syncope in some patients because of its alpha-blocking activity. In pooled results of the three placebo-controlled, 6-week, fixed-dose trials in subjects with schizophrenia, syncope was reported in 0.8% (7/850) of subjects treated with INVEGA® (3 mg, 6 mg, 9 mg, 12 mg) compared to 0.3% (1/355) of subjects treated with placebo. INVEGA® should be used with caution in patients with known cardiovascular disease (e.g., heart failure, history of myocardial infarction or ischemia, conduction abnormalities), cerebrovascular disease, or conditions that predispose the patient to hypotension (e.g., dehydration, hypovolemia, and treatment with antihypertensive medications). Monitoring of orthostatic vital signs should be considered in patients who are vulnerable to hypotension.

**Leukopenia, Neutropenia, and Agranulocytosis:** *Class Effect:* In clinical trial and/or postmarketing experience, events of leukopenia/neutropenia have been reported temporally related to antipsychotic agents, including INVEGA®. Agranulocytosis has also been reported.

Possible risk factors for leukopenia/neutropenia include pre-existing low white blood cell count (WBC) and history of drug-induced leukopenia/neutropenia. Patients with a history of a clinically significant low WBC or a drug-induced leukopenia/neutropenia should have their complete blood count (CBC) monitored frequently during the first few months of therapy and discontinuation of INVEGA® should be considered at the first sign of a clinically significant decline in WBC in the absence of other causative factors.

Patients with clinically significant neutropenia should be carefully monitored for fever or other symptoms or signs of infection and treated promptly if such symptoms or signs occur. Patients with severe neutropenia (absolute neutrophil count <1000/mm<sup>3</sup>) should discontinue INVEGA® and have their WBC followed until recovery.

**Potential for Cognitive and Motor Impairment:** Somnolence was reported in subjects treated with INVEGA® [see *Adverse Reactions*]. Antipsychotics, including INVEGA®, have the potential to impair judgment, thinking, or motor skills. Patients should be cautioned about performing activities requiring mental alertness, such as operating hazardous machinery or operating a motor vehicle, until they are reasonably certain that paliperidone therapy does not adversely affect them.

**Seizures:** During premarketing clinical trials in subjects with schizophrenia (the three placebo-controlled, 6-week, fixed-dose studies and a study conducted in elderly schizophrenic subjects), seizures occurred in 0.22% of subjects treated with INVEGA® (3 mg, 6 mg, 9 mg, 12 mg) and 0.25% of subjects treated with placebo. Like other antipsychotic drugs, INVEGA® should be used cautiously in patients with a history of seizures or other conditions that potentially lower the seizure threshold. Conditions that lower the seizure threshold may be more prevalent in patients 65 years or older.

**Dysphagia:** Esophageal dysmotility and aspiration have been associated with antipsychotic drug use. Aspiration pneumonia is a common cause of morbidity and mortality in patients with advanced Alzheimer's dementia. INVEGA® and other antipsychotic drugs should be used cautiously in patients at risk for aspiration pneumonia.

**Suicide:** The possibility of suicide attempt is inherent in psychotic illnesses, and close supervision of high-risk patients should accompany drug therapy. Prescriptions for INVEGA® should be written for the smallest quantity of tablets consistent with good patient management in order to reduce the risk of overdose.

**Priapism:** Drugs with alpha-adrenergic blocking effects have been reported to induce priapism. Priapism has been reported with INVEGA® during postmarketing surveillance. Severe priapism may require surgical intervention.

**Thrombotic Thrombocytopenic Purpura (TTP):** No cases of TTP were observed during clinical studies with paliperidone. Although cases of TTP have been reported in association with risperidone administration, the relationship to risperidone therapy is unknown.

**Body Temperature Regulation:** Disruption of the body's ability to reduce core body temperature has been attributed to antipsychotic agents. Appropriate care is advised when prescribing INVEGA® to patients who will be experiencing conditions which may contribute to an elevation in core body temperature, e.g., exercising strenuously, exposure to extreme heat, receiving concomitant medication with anticholinergic activity, or being subject to dehydration.

**Antiemetic Effect:** An antiemetic effect was observed in preclinical studies with paliperidone. This effect, if it occurs in humans, may mask the signs and symptoms of overdose with certain drugs or of conditions such as intestinal obstruction, Reye's syndrome, and brain tumor.

**Use in Patients with Concomitant Illness:** Clinical experience with INVEGA® in patients with certain concomitant illnesses is limited [see *Clinical Pharmacology (12.3) in full PI*].

Patients with Parkinson's Disease or Dementia with Lewy Bodies are reported to have an increased sensitivity to antipsychotic medication. Manifestations of this increased sensitivity include confusion, obtundation, postural instability with frequent falls, extrapyramidal symptoms, and clinical features consistent with the neuroleptic malignant syndrome.

INVEGA® has not been evaluated or used to any appreciable extent in patients with a recent history of myocardial infarction or unstable heart disease. Patients with these diagnoses were excluded from premarketing clinical trials. Because of the risk of orthostatic hypotension with INVEGA®, caution should be observed in patients with known cardiovascular disease [see *Warnings and Precautions*].

**Monitoring: Laboratory Tests:** No specific laboratory tests are recommended.

#### ADVERSE REACTIONS

The following are discussed in more detail in other sections of the labeling:

- Increased mortality in elderly patients with dementia-related psychosis [see *Boxed Warning and Warnings and Precautions*]
- Cerebrovascular adverse events, including stroke, in elderly patients with dementia-related psychosis [see *Warnings and Precautions*]
- Neuroleptic malignant syndrome [see *Warnings and Precautions*]
- QT prolongation [see *Warnings and Precautions*]
- Tardive dyskinesia [see *Warnings and Precautions*]
- Hyperglycemia and diabetes mellitus [see *Warnings and Precautions*]
- Hyperprolactinemia [see *Warnings and Precautions*]
- Potential for Gastrointestinal Obstruction [see *Warnings and Precautions*]
- Orthostatic hypotension and syncope [see *Warnings and Precautions*]
- Leukopenia, neutropenia, and agranulocytosis [see *Warnings and Precautions*]
- Potential for cognitive and motor impairment [see *Warnings and Precautions*]
- Seizures [see *Warnings and Precautions*]
- Dysphagia [see *Warnings and Precautions*]
- Suicide [see *Warnings and Precautions*]
- Priapism [see *Warnings and Precautions*]
- Thrombotic thrombocytopenic purpura (TTP) [see *Warnings and Precautions*]
- Disruption of body temperature regulation [see *Warnings and Precautions*]
- Antiemetic effect [see *Warnings and Precautions*]
- Increased sensitivity in patients with Parkinson's disease or those with dementia with Lewy bodies [see *Warnings and Precautions*]
- Diseases or conditions that could affect metabolism or hemodynamic responses [see *Warnings and Precautions*]

The most common adverse reactions in clinical trials in subjects with schizophrenia (reported in 5% or more of subjects treated with INVEGA® and at least twice the placebo rate in any of the dose groups) were extrapyramidal symptoms, tachycardia, and akathisia. The most common adverse reactions in clinical trials in patients with schizoaffective disorder (reported in 5% or more of subjects treated with INVEGA® and at least twice the placebo rate) were extrapyramidal symptoms, somnolence, dyspepsia, constipation, weight increased, and nasopharyngitis.

The most common adverse reactions that were associated with discontinuation from clinical trials in subjects with schizophrenia (causing discontinuation in 2% of INVEGA®-treated subjects) were nervous system disorders. The most common adverse reactions that were associated with discontinuation from clinical trials in subjects with schizoaffective disorder were gastrointestinal disorders, which resulted in discontinuation in 1% of INVEGA®-treated subjects. [See *Adverse Reactions*].

The safety of INVEGA® was evaluated in 1205 adult subjects with schizophrenia who participated in three placebo-controlled, 6-week, double-blind trials, of whom 850 subjects received INVEGA® at fixed doses ranging from 3 mg to 12 mg once daily. The information presented in this section was derived from pooled data from these three trials. Additional safety information from the placebo-controlled phase of the long-term maintenance study, in which subjects received INVEGA® at daily doses within the range of 3 mg to 15 mg (n=104), is also included.

The safety of INVEGA® was also evaluated in 622 adult subjects with schizoaffective disorder who participated in two placebo-controlled, 6-week, double-blind trials. In one of these trials, 206 subjects were assigned to one of two dose levels of INVEGA®: 6 mg with the option to reduce to 3 mg (n = 108) or 12 mg with the option to reduce to 9 mg (n = 98) once daily. In the other study, 214

subjects received flexible doses of INVEGA® (3-12 mg once daily). Both studies included subjects who received INVEGA® either as monotherapy or as an adjunct to mood stabilizers and/or antidepressants. Adverse events during exposure to study treatment were obtained by general inquiry and recorded by clinical investigators using their own terminology. Consequently, to provide a meaningful estimate of the proportion of individuals experiencing adverse events, events were grouped in standardized categories using MedDRA terminology.

Throughout this section, adverse reactions are reported. Adverse reactions are adverse events that were considered to be reasonably associated with the use of INVEGA® (adverse drug reactions) based on the comprehensive assessment of the available adverse event information. A causal association for INVEGA® often cannot be reliably established in individual cases. Further, because clinical trials are conducted under widely varying conditions, adverse reaction rates observed in the clinical trials of a drug cannot be directly compared to rates in the clinical trials of another drug and may not reflect the rates observed in clinical practice.

**Commonly-Observed Adverse Reactions in Double-Blind, Placebo-Controlled Clinical Trials – Schizophrenia:** Table 1 enumerates the pooled incidences of adverse reactions reported in the three placebo-controlled, 6-week, fixed-dose studies, listing those that occurred in 2% or more of subjects treated with INVEGA® in any of the dose groups, and for which the incidence in INVEGA®-treated subjects in any of the dose groups was greater than the incidence in subjects treated with placebo.

**Table 1. Adverse Reactions Reported by ≥ 2% of INVEGA®-Treated Subjects with Schizophrenia in Three Short-Term, Fixed-Dose, Placebo-Controlled Clinical Trials\*:** Body System or Organ Class Dictionary-Derived Term followed by Percent of Patients Reporting Event Placebo (N=355) first, INVEGA® 3 mg once daily (N=127) second, 6 mg once daily (N=235) third, 9 mg once daily (N=246) fourth, 12 mg once daily (N=242) fifth: **Total percentage of subjects with adverse reactions:** 37, 48, 47, 53, 59; **Cardiac disorders:** Atrioventricular block first degree 1, 2, 0, 2, 1; Bundle branch block 2, 3, 1, 3, <1; Sinus arrhythmia 0, 2, 1, 1, <1; Tachycardia 7, 14, 12, 12, 14; **Gastrointestinal disorders:** Abdominal pain upper 1, 1, 3, 2, 2; Dry mouth 1, 2, 3, 1, 3; Salivary hypersecretion <10<114; **General disorders:** Asthenia 1, 2, <1, 2, 2; Fatigue 1, 2, 1, 2, 2; **Nervous system disorders:** Akathisia 4, 4, 3, 8, 10; Dizziness 4, 6, 5, 4, 5; Extrapryramidal symptoms 8, 10, 7, 20, 18; Headache 12, 11, 12, 14, 14; Somnolence 7, 6, 9, 10, 11; **Vascular disorders:** Orthostatic hypotension 1, 2, 1, 2, 4.

\* Table includes adverse reactions that were reported in 2% or more of subjects in any of the INVEGA® dose groups and which occurred at greater incidence than in the placebo group. Data are pooled from three studies; one study included once-daily INVEGA® doses of 3 mg and 9 mg, the second study included 6 mg, 9 mg, and 12 mg, and the third study included 6 mg and 12 mg [see Clinical Studies (14) in full PI]. Extrapryramidal symptoms includes the terms dyskinesia, dystonia, extrapryramidal disorder, hypertonia, muscle rigidity, oculogyration, parkinsonism, and tremor. Somnolence includes the terms sedation and somnolence. Tachycardia includes the terms tachycardia, sinus tachycardia, and heart rate increased. Adverse reactions for which the INVEGA® incidence was equal to or less than placebo are not listed in the table, but included the following: vomiting.

**Commonly-Observed Adverse Reactions in Double-Blind, Placebo-Controlled Clinical Trials – Schizoaffective Disorder:** Table 2 enumerates the pooled incidences of adverse reactions reported in the two placebo-controlled 6-week studies, listing those that occurred in 2% or more of subjects treated with INVEGA® and for which the incidence in INVEGA®-treated subjects was greater than the incidence in subjects treated with placebo.

**Table 2. Adverse Drug Reactions Reported by ≥ 2% of INVEGA®-Treated Subjects with Schizoaffective Disorder in Two Double-Blind, Placebo-Controlled Clinical Trials:** Body System or Organ Class Dictionary-Derived Term followed by Placebo (N=202) first, INVEGA® 3-6 mg once-daily fixed-dose range (N=108) second, INVEGA® 9-12 mg once-daily fixed-dose range (N=98) third, INVEGA® 3-12 mg once-daily flexible dose (N=214) fourth: **Total percentage of subjects with adverse reactions:** 32, 48, 50, 43; **Cardiac disorders:** Tachycardia 2, 3, 1, 2; **Gastrointestinal disorders:** Abdominal discomfort/Abdominal pain upper 1, 1, 0, 3; Constipation 2, 4, 5, 4; Dyspepsia 2, 5, 6, 6; Nausea 6, 8, 8, 5; Stomach discomfort 1, 0, 1, 2; **General disorders:** Asthenia 1, 3, 4, <1; **Infections and Infestations:** Nasopharyngitis 1, 2, 5, 3; Rhinitis 0, 1, 3, 1; Upper respiratory tract infection 1, 2, 2, 2; **Investigations:** Weight increased 1, 5, 4, 4; **Metabolism and nutrition disorders:** Decreased appetite <1, 1, 0, 2; Increased appetite <1, 3, 2, 2; **Musculoskeletal and connective tissue disorders:** Back pain 1, 1, 1, 3; Myalgia <1, 2, 4, 1; **Nervous system disorders:** Akathisia 4, 4, 6, 6; Dysarthria 0, 1, 4, 2; Extrapryramidal symptoms 8, 20, 17, 12; Somnolence 5, 12, 12, 8; **Psychiatric disorders:** Sleep disorder <1, 2, 3, 0; **Respiratory, thoracic and mediastinal disorders:** Cough 1, 1, 3, 1; Pharyngolaryngeal pain <1, 0, 2, 1. \* Table includes adverse reactions that were reported in 2% or more of subjects in any of the INVEGA® dose groups and which occurred at greater incidence than in the placebo group. Data are pooled from two studies. One study included once-daily INVEGA® doses of 6 mg (with the option to reduce to 3 mg) and 12 mg (with the option to reduce to 9 mg). The second study included flexible once-daily doses of 3 to 12 mg. Among the 420 subjects treated with INVEGA®, 230 (55%) received INVEGA® as monotherapy and 190 (45%) received INVEGA® as an adjunct to mood stabilizers and/or antidepressants. Somnolence includes the terms sedation and somnolence. Tachycardia includes the terms tachycardia, sinus tachycardia, and heart rate increased. All EPS-related terms are grouped under "extrapryramidal symptoms".

Monotherapy versus Adjunctive Therapy: The designs of the two placebo-controlled, 6-week, double-blind trials in subjects with schizoaffective disorder included the option for subjects to receive antidepressants (except monoamine oxidase inhibitors) and/or mood stabilizers (lithium, valproate, or lamotrigine). In

the subject population evaluated for safety, 230 (55%) subjects received INVEGA® as monotherapy and 190 (45%) subjects received INVEGA® as an adjunct to mood stabilizers and/or antidepressants. When comparing these 2 subpopulations, only nausea occurred at a greater frequency (≥ 3% difference) in subjects receiving INVEGA® as monotherapy.

**Other Adverse Reactions Observed During Premarketing Evaluation of INVEGA®:** The following additional adverse reactions occurred in < 2% of INVEGA®-treated subjects in the above schizophrenia and schizoaffective disorder clinical trial datasets.

**Cardiac disorders:** bradycardia, palpitations

**Eye disorders:** vision blurred

**Gastrointestinal disorders:** abdominal pain, small intestinal obstruction, swollen tongue

**General disorders:** edema

**Immune system disorders:** anaphylactic reaction

**Nervous system disorders:** dizziness postural, grand mal convulsion, lethargy, syncope

**Psychiatric disorders:** nightmare

**Reproductive system and breast disorders:** amenorrhea, breast discharge, breast engorgement, breast pain, erectile dysfunction, galactorrhea, gynecomastia, menstruation irregular

**Vascular disorders:** hypotension, ischemia

**Discontinuations Due to Adverse Reactions:** Schizophrenia Trials: The percentages of subjects who discontinued due to adverse reactions in the three schizophrenia placebo-controlled, 6-week, fixed-dose studies were 3% and 1% in INVEGA®- and placebo-treated subjects, respectively. The most common reasons for discontinuation were nervous system disorders (2% and 0% in INVEGA®- and placebo-treated subjects, respectively).

Schizoaffective Disorder Trials: The percentages of subjects who discontinued due to adverse reactions in the two schizoaffective disorder placebo-controlled 6-week studies were 1% and <1% in INVEGA®- and placebo-treated subjects, respectively. The most common reasons for discontinuation were gastrointestinal disorders (1% and 0% in INVEGA®- and placebo-treated subjects, respectively).

**Dose-Related Adverse Reactions:** Schizophrenia Trials: Based on the pooled data from the three placebo-controlled, 6-week, fixed-dose studies in subjects with schizophrenia, among the adverse reactions that occurred with a greater than 2% incidence in the subjects treated with INVEGA®, the incidences of the following adverse reactions increased with dose: somnolence, orthostatic hypotension, akathisia, dystonia, extrapryramidal disorder, hypertonia, parkinsonism, and salivary hypersecretion. For most of these, the increased incidence was seen primarily at the 12 mg dose, and, in some cases, the 9 mg dose.

Schizoaffective Disorder Trials: In a placebo-controlled, 6-week, high- and low-dose study in subjects with schizoaffective disorder, akathisia, dystonia, dysarthria, myalgia, nasopharyngitis, rhinitis, cough, and pharyngolaryngeal pain occurred more frequently (i.e., a difference of at least 2%) in subjects who received higher doses of INVEGA® compared with subjects who received lower doses.

**Demographic Differences:** An examination of population subgroups in the three placebo-controlled, 6-week, fixed-dose studies in subjects with schizophrenia and in the two placebo-controlled, 6-week studies in subjects with schizoaffective disorder did not reveal any evidence of clinically relevant differences in safety on the basis of gender or race alone; there was also no difference on the basis of age [see Use in Specific Populations].

**Extrapryramidal Symptoms (EPS):** Pooled data from the three placebo-controlled, 6-week, fixed-dose studies in subjects with schizophrenia provided information regarding treatment-emergent EPS. Several methods were used to measure EPS: (1) the Simpson-Angus global score (mean change from baseline) which broadly evaluates Parkinsonism, (2) the Barnes Akathisia Rating Scale global clinical rating score (mean change from baseline) which evaluates akathisia, (3) use of anticholinergic medications to treat emergent EPS (Table 3), and (4) incidence of spontaneous reports of EPS (Table 4). For the Simpson-Angus Scale, spontaneous EPS reports and use of anticholinergic medications, there was a dose-related increase observed for the 9 mg and 12 mg doses. There was no difference observed between placebo and INVEGA® 3 mg and 6 mg doses for any of these EPS measures.

**Table 3. Treatment-Emergent Extrapryramidal Symptoms (EPS) Assessed by Incidence of Ratings Scales and Use of Anticholinergic Medication – Schizophrenia Studies:** EPS Group followed by Percentage of Patients Placebo (N=355) first, INVEGA® 3 mg once daily (N=127) second, 6 mg once daily (N=235) third, 9 mg once daily (N=246) fourth, 12 mg once daily (N=242) fifth: Parkinsonism<sup>a</sup> 9, 11, 3, 15, 14; Akathisia<sup>b</sup> 6, 6, 4, 7, 9; Use of anticholinergic medications<sup>c</sup> 10, 10, 9, 22, 22. a: For Parkinsonism, percent of patients with Simpson-Angus global score > 0.3 (Global score defined as total sum of items score divided by the number of items); b: For Akathisia, percent of patients with Barnes Akathisia Rating Scale global score ≥ 2; c: Percent of patients who received anticholinergic medications to treat emergent EPS

**Table 4. Treatment-Emergent Extrapryramidal Symptoms (EPS)-Related Adverse Events by MedDRA Preferred Term – Schizophrenia Studies:** EPS Group followed by Percentage of Patients Placebo (N=355) first, INVEGA® 3 mg once daily (N=127) second, 6 mg once daily (N=235) third, 9 mg once daily (N=246) fourth, 12 mg once daily (N=242) fifth: Overall percentage of patients with EPS-related AE 11, 13, 10, 25, 26; Dyskinesia 3, 5, 3, 8, 9; Dystonia 1, 1, 1, 5, 5; Hyperkinesia 4, 3, 8, 10; Parkinsonism 2, 3, 3, 7, 6; Tremor 3, 3, 3, 4, 3.

Dyskinesia group includes: Dyskinesia, extrapyramidal disorder, muscle twitching, tardive dyskinesia

Dystonia group includes: Dystonia, muscle spasms, oculogyration, trismus

Hyperkinesia group includes: Akathisia, hyperkinesia

Parkinsonism group includes: Bradykinesia, cogwheel rigidity, drooling, hypertonia, hypokinesia, muscle rigidity, musculoskeletal stiffness, parkinsonism

Tremor group includes: Tremor

Compared to data from the studies in schizophrenia, pooled data from the two placebo-controlled 6-week studies in subjects with schizoaffective disorder showed similar types and frequencies of EPS as measured by rating scales, anticholinergic medication use, and spontaneous reports of EPS-related adverse events. For subjects with schizoaffective disorder, there was no dose-related increase in EPS observed for parkinsonism with the Simpson-Angus scale or akathisia with the Barnes Akathisia Rating Scale. There was a dose-related increase observed with spontaneous EPS reports of hyperkinesia and dystonia and in the use of anticholinergic medications.

Table 5 shows the EPS data from the pooled schizoaffective disorder trials.

**Table 5. Treatment-Emergent Extrapyramidal Symptoms (EPS)-Related Adverse Events by MedDRA Preferred Term – Schizoaffective Disorder Studies: EPS Group followed by Percentage of Patients Placebo (N=202) first, INVEGA® 3-6 mg once-daily fixed-dose range (N=108) second, 9-12 mg once-daily fixed-dose range (N=98) third, 3-12 mg once-daily flexible dose (N=214):** Overall percentage of patients with EPS-related AE 11, 23, 22, 17; Dyskinesia 1, 3, 1, 1; Dystonia 1, 2, 3, 2; Hyperkinesia 5, 5, 8, 7; Parkinsonism 3, 14, 7, 7; Tremor 3, 12, 11, 5.

Dyskinesia group includes: Dyskinesia, muscle twitching

Dystonia group includes: Dystonia, muscle spasms, oculogyration

Hyperkinesia group includes: Akathisia, hyperkinesia, restlessness

Parkinsonism group includes: Bradykinesia, drooling, hypertonia, muscle rigidity, muscle tightness, musculoskeletal stiffness, parkinsonian gait, parkinsonism

Tremor group includes: Tremor

**Dystonia: Class Effect:** Symptoms of dystonia, prolonged abnormal contractions of muscle groups, may occur in susceptible individuals during the first few days of treatment. Dystonic symptoms include: spasm of the neck muscles, sometimes progressing to tightness of the throat, swallowing difficulty, difficulty breathing, and/or protrusion of the tongue. While these symptoms can occur at low doses, they occur more frequently and with greater severity with high potency and at higher doses of first generation antipsychotic drugs. An elevated risk of acute dystonia is observed in males and younger age groups.

**Laboratory Test Abnormalities:** In the pooled data from the three placebo-controlled, 6-week, fixed-dose studies in subjects with schizophrenia and from the two placebo-controlled, 6-week studies in subjects with schizoaffective disorder, between-group comparisons revealed no medically important differences between INVEGA® and placebo in the proportions of subjects experiencing potentially clinically significant changes in routine serum chemistry, hematology, or urinalysis parameters. Similarly, there were no differences between INVEGA® and placebo in the incidence of discontinuations due to changes in hematology, urinalysis, or serum chemistry, including mean changes from baseline in fasting glucose, insulin, c-peptide, triglyceride, HDL, LDL, and total cholesterol measurements. However, INVEGA® was associated with increases in serum prolactin [see Warnings and Precautions].

**Weight Gain:** Schizophrenia Trials: In the pooled data from the three placebo-controlled, 6-week, fixed-dose studies in subjects with schizophrenia, the proportions of subjects meeting a weight gain criterion of  $\geq 7\%$  of body weight were compared, revealing a similar incidence of weight gain for INVEGA® 3 mg and 6 mg (7% and 6%, respectively) compared with placebo (5%), and a higher incidence of weight gain for INVEGA® 9 mg and 12 mg (9% and 9%, respectively).

Schizoaffective Disorder Trials: In the pooled data from the two placebo-controlled, 6-week studies in subjects with schizoaffective disorder, a higher percentage of INVEGA®-treated subjects (5%) had an increase in body weight of  $\geq 7\%$  compared with placebo-treated subjects (1%). In the study that examined high- and low-dose groups, the increase in body weight of  $\geq 7\%$  was 3% in the low-dose group, 7% in the high-dose group, and 1% in the placebo group.

**Other Findings Observed During Clinical Trials:** The safety of INVEGA® was also evaluated in a long-term trial designed to assess the maintenance of effect with INVEGA® in adults with schizophrenia [see Clinical Studies (14) in full PI]. In general, adverse reaction types, frequencies, and severities during the initial 14-week open-label phase of this study were comparable to those observed in the 6-week, placebo-controlled, fixed-dose studies. Adverse reactions reported during the long-term double-blind phase of this study were similar in type and severity to those observed in the initial 14-week open-label phase.

**Postmarketing Experience:** The following adverse reaction has been identified during postapproval use of INVEGA®; because this reaction was reported voluntarily from a population of uncertain size, it is not possible to reliably estimate its frequency: priapism.

**Adverse Reactions Reported With Risperidone:** Paliperidone is the major active metabolite of risperidone. Adverse reactions reported with risperidone can be found in the ADVERSE REACTIONS section of the risperidone package insert.

## DRUG INTERACTIONS

**Potential for INVEGA® to Affect Other Drugs:** Given the primary CNS effects of paliperidone [see Adverse Reactions], INVEGA® should be used with caution in

combination with other centrally acting drugs and alcohol. Paliperidone may antagonize the effect of levodopa and other dopamine agonists.

Because of its potential for inducing orthostatic hypotension, an additive effect may be observed when INVEGA® is administered with other therapeutic agents that have this potential [see Warnings and Precautions].

Paliperidone is not expected to cause clinically important pharmacokinetic interactions with drugs that are metabolized by cytochrome P450 isozymes. *In vitro* studies in human liver microsomes showed that paliperidone does not substantially inhibit the metabolism of drugs metabolized by cytochrome P450 isozymes, including CYP1A2, CYP2A6, CYP2C8/9/10, CYP2D6, CYP2E1, CYP3A4, and CYP3A5. Therefore, paliperidone is not expected to inhibit clearance of drugs that are metabolized by these metabolic pathways in a clinically relevant manner. Paliperidone is also not expected to have enzyme inducing properties.

Paliperidone is a weak inhibitor of P-glycoprotein (P-gp) at high concentrations. No *in vivo* data are available and the clinical relevance is unknown.

Pharmacokinetic interaction between lithium and INVEGA® is unlikely.

In a clinical study, subjects on a stable dose of valproate showed comparable valproate average plasma concentrations when 3-15 mg of INVEGA® was added to their existing valproate treatment.

**Potential for Other Drugs to Affect INVEGA®:** Paliperidone is not a substrate of CYP1A2, CYP2A6, CYP2C9, and CYP2C19, so that an interaction with inhibitors or inducers of these isozymes is unlikely. While *in vitro* studies indicate that CYP2D6 and CYP3A4 may be minimally involved in paliperidone metabolism, *in vivo* studies do not show decreased elimination by these isozymes and they contribute to only a small fraction of total body clearance. *In vitro* studies have shown that paliperidone is a P-gp substrate.

Co-administration of INVEGA® 6 mg once daily with carbamazepine 200 mg twice daily caused a decrease of approximately 37% in the mean steady-state  $C_{max}$  and AUC of paliperidone. This decrease is caused, to a substantial degree, by a 35% increase in renal clearance of paliperidone. A minor decrease in the amount of drug excreted unchanged in the urine suggests that there was little effect on the CYP metabolism or bioavailability of paliperidone during carbamazepine co-administration. On initiation of carbamazepine, the dose of INVEGA® should be re-evaluated and increased if necessary. Conversely, on discontinuation of carbamazepine, the dose of INVEGA® should be re-evaluated and decreased if necessary.

Paliperidone is metabolized to a limited extent by CYP2D6 [see Clinical Pharmacology (12.3) in full PI]. In an interaction study in healthy subjects in which a single 3 mg dose of INVEGA® was administered concomitantly with 20 mg per day of paroxetine (a potent CYP2D6 inhibitor), paliperidone exposures were on average 16% (90% CI: 4, 30) higher in CYP2D6 extensive metabolizers. Higher doses of paroxetine have not been studied. The clinical relevance is unknown.

Co-administration of a single dose of INVEGA® 12 mg with divalproex sodium extended-release tablets (two 500 mg tablets once daily) resulted in an increase of approximately 50% in the  $C_{max}$  and AUC of paliperidone. Dosage reduction for INVEGA® should be considered when INVEGA® is co-administered with valproate after clinical assessment.

Pharmacokinetic interaction between lithium and INVEGA® is unlikely.

## USE IN SPECIFIC POPULATIONS

**Pregnancy: Pregnancy Category C:** There are no adequate and well controlled studies of INVEGA® in pregnant women. INVEGA® should be used during pregnancy only if the potential benefit justifies the potential risk to the fetus.

Use of first generation antipsychotic drugs during the last trimester of pregnancy has been associated with extrapyramidal symptoms in the neonate. These symptoms are usually self-limited. It is not known whether paliperidone, when taken near the end of pregnancy, will lead to similar neonatal signs and symptoms.

In animal reproduction studies, there were no increases in fetal abnormalities when pregnant rats and rabbits were treated during the period of organogenesis with up to 8 times the maximum recommended human dose of paliperidone (on a mg/m<sup>2</sup> basis).

In rat reproduction studies with risperidone, which is extensively converted to paliperidone in rats and humans, there were increases in pup deaths seen at oral doses which are less than the maximum recommended human dose of risperidone on a mg/m<sup>2</sup> basis (see risperidone package insert).

**Nursing Mothers:** Paliperidone is 9-hydroxyrisperidone, the active metabolite of risperidone. In animal studies, risperidone and 9-hydroxyrisperidone were excreted in milk. Risperidone and 9-hydroxyrisperidone are also excreted in human breast milk. Caution should be exercised when INVEGA® is administered to a nursing woman. The known benefits of breastfeeding should be weighed against the unknown risks of infant exposure to paliperidone.

**Pediatric Use:** Safety and effectiveness of INVEGA® in patients < 18 years of age have not been established.

**Geriatric Use:** The safety, tolerability, and efficacy of INVEGA® were evaluated in a 6-week placebo-controlled study of 114 elderly subjects with schizophrenia (65 years of age and older, of whom 21 were 75 years of age and older). In this study, subjects received flexible doses of INVEGA® (3 mg to 12 mg once daily). In addition, a small number of subjects 65 years of age and older were included in the 6-week placebo-controlled studies in which adult schizophrenic subjects received fixed doses of INVEGA® (3 mg to 15 mg once daily) [see Clinical Studies (14) in full PI]. There were no subjects  $\geq 65$  years of age in the schizoaffective disorder studies.

Overall, of the total number of subjects in schizophrenia clinical studies of INVEGA® (n = 1796), including those who received INVEGA® or placebo, 125 (7.0%) were 65 years of age and older and 22 (1.2%) were 75 years of age and older. No overall differences in safety or effectiveness were observed between these subjects and younger subjects, and other reported clinical experience has not identified differences in response between the elderly and younger patients, but greater sensitivity of some older individuals cannot be ruled out.

This drug is known to be substantially excreted by the kidney and clearance is decreased in patients with moderate to severe renal impairment [see *Clinical Pharmacology* (12.3) in full PI], who should be given reduced doses. Because elderly patients are more likely to have decreased renal function, care should be taken in dose selection, and it may be useful to monitor renal function [see *Dosage and Administration* (2.5) in full PI].

**Renal Impairment:** Dosing must be individualized according to the patient's renal function status [see *Dosage and Administration* (2.5) in full PI].

**Hepatic Impairment:** No dosage adjustment is required in patients with mild to moderate hepatic impairment. INVEGA® has not been studied in patients with severe hepatic impairment.

**DRUG ABUSE AND DEPENDENCE**

**Controlled Substance:** INVEGA® (paliperidone) is not a controlled substance.

**Abuse:** Paliperidone has not been systematically studied in animals or humans for its potential for abuse. It is not possible to predict the extent to which a CNS-active drug will be misused, diverted, and/or abused once marketed. Consequently, patients should be evaluated carefully for a history of drug abuse, and such patients should be observed closely for signs of INVEGA® misuse or abuse (e.g., development of tolerance, increases in dose, drug-seeking behavior).

**Dependence:** Paliperidone has not been systematically studied in animals or humans for its potential for tolerance or physical dependence.

**OVERDOSAGE**

**Human Experience:** While experience with paliperidone overdose is limited, among the few cases of overdose reported in pre-marketing trials, the highest estimated ingestion of INVEGA® was 405 mg. Observed signs and symptoms included extrapyramidal symptoms and gait unsteadiness. Other potential signs and symptoms include those resulting from an exaggeration of paliperidone's known pharmacological effects, i.e., drowsiness and somnolence, tachycardia and hypotension, and QT prolongation.

Paliperidone is the major active metabolite of risperidone. Overdose experience reported with risperidone can be found in the OVERDOSAGE section of the risperidone package insert.

**Management of Overdosage:** There is no specific antidote to paliperidone, therefore, appropriate supportive measures should be instituted and close medical supervision and monitoring should continue until the patient recovers. Consideration should be given to the extended-release nature of the product when assessing treatment needs and recovery. Multiple drug involvement should also be considered.

In case of acute overdose, establish and maintain an airway and ensure adequate oxygenation and ventilation. Gastric lavage (after intubation if patient is unconscious) and administration of activated charcoal together with a laxative should be considered.

The possibility of obtundation, seizures, or dystonic reaction of the head and neck following overdose may create a risk of aspiration with induced emesis.

Cardiovascular monitoring should commence immediately, including continuous electrocardiographic monitoring for possible arrhythmias. If antiarrhythmic therapy is administered, disopyramide, procainamide, and quinidine carry a theoretical hazard of additive QT-prolonging effects when administered in patients with an acute overdose of paliperidone. Similarly the alpha-blocking properties of bretylium might be additive to those of paliperidone, resulting in problematic hypotension.

Hypotension and circulatory collapse should be treated with appropriate measures, such as intravenous fluids and/or sympathomimetic agents (epinephrine and dopamine should not be used, since beta stimulation may worsen hypotension in the setting of paliperidone-induced alpha blockade). In cases of severe extrapyramidal symptoms, anticholinergic medication should be administered.

Inactive ingredients are carnauba wax, cellulose acetate, hydroxyethyl cellulose, propylene glycol, polyethylene glycol, polyethylene oxides, povidone, sodium chloride, stearic acid, butylated hydroxytoluene, hypromellose, titanium dioxide, and iron oxides. The 3 mg tablets also contain lactose monohydrate and triacetin.

**Manufactured by:**

ALZA Corporation, Vacaville, CA 95688 OR  
Janssen Cilag Manufacturing, LLC, Gurabo, Puerto Rico 00778

**Manufactured for:**

Janssen, Division of Ortho-McNeil-Janssen Pharmaceuticals, Inc.,  
Titusville, NJ 08850

OROS is a registered trademark of ALZA Corporation

©Ortho-McNeil-Janssen Pharmaceuticals, Inc. 2007

Revised: July 2009

10105906B

**NEW FROM JOHNS HOPKINS**

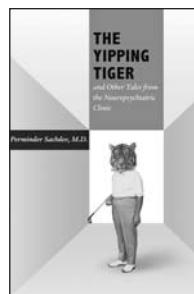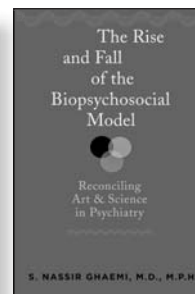

**Eating Disorders**

A Guide to Medical Care and Complications  
*second edition*

Philip S. Mehler, M.D., and Arnold E. Andersen, M.D.

**The Yipping Tiger and Other Tales from the Neuropsychiatric Clinic**

Perminder Sachdev, M.D.

"Dr. Sachdev's cases and his analysis of them are wonderful reading . . . His enduring love of the field and compassion for the patients shines through on every page."

—Andrew F. Angelino, M.D., Johns Hopkins Medical Institutions  
\$24.95 hardcover

"An excellent guide to the medical issues connected with eating disorders."  
—*Psychiatric Services*, reviewing the first edition  
\$30.00 paperback

**Treating Dementia**

Do We Have a Pill for It?  
edited by Jesse F. Ballenger, Ph.D., Peter J. Whitehouse, M.D., Ph.D., Constantine G. Lyketsos, M.D., M.H.S., Peter V. Rabins, M.D., M.P.H., and Jason H. T. Karlawish, M.D.

This multidisciplinary dialogue addresses central questions about the history and future of drug treatment for dementia and makes clear why there are no simple answers.  
\$60.00 hardcover

**The Rise and Fall of the Biopsychosocial Model**

Reconciling Art and Science in Psychiatry  
S. Nassir Ghaemi, M.D., M.P.H.

This is the first book-length historical critique of psychiatry's mainstream ideology, the biopsychosocial (BPS) model. Ghaemi details the origins and evolution of the BPS model and explains how, where, and why it fails to live up to its promises. He makes the case for a new paradigm of medical humanism and method-based psychiatry that is consistent with modern science while incorporating humanistic aspects of the art of medicine.  
\$50.00 hardcover

**Personal Identity and Fractured Selves**

Perspectives from Philosophy, Ethics, and Neuroscience  
edited by Debra J. H. Mathews, Ph.D., M.A., Hilary Bok, Ph.D., and Peter V. Rabins, M.D., M.P.H.

This book brings together some of the best minds in neurology and philosophy to discuss the concept of personal identity and the moral dimensions of treating brain disease and injury.  
\$55.00 hardcover

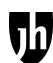

**The Johns Hopkins University Press**  
1-800-537-5487 • press.jhu.edu

# PSYCHIATRY

## BOARD REVIEW SERIES

### THE KAUFMAN COURSES

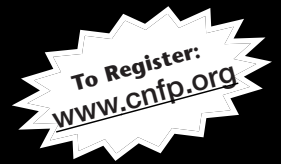

SPONSORED BY MONTEFIORE MEDICAL CENTER CREDIT DESIGNATED BY ALBERT EINSTEIN COLLEGE OF MEDICINE  
Accreditation Statement: Albert Einstein College of Medicine is accredited by the  
Accreditation Council for Continuing Medical Education (ACCME) to provide continuing medical education for physicians.

#### CLINICAL NEUROLOGY FOR PSYCHIATRISTS

**David Myland Kaufman, MD**

This intensive three-day weekend course, offered for the 38th year, is designed for psychiatrists in practice and in residency as an update and board preparation. Focusing on essential topics, the course uses lectures, an extensive syllabus, and the new edition of *Clinical Neurology for Psychiatrists*, David M. Kaufman (6th edition, Elsevier).

AMA Statement: Albert Einstein College of Medicine designates this educational activity for a maximum of 25 AMA PRA Category 1 Credit(s).™ Physicians should only claim credit commensurate with the extent of their participation in the activity.

#### LOS ANGELES

The Westin Hotel at the Los Angeles Airport  
5400 West Century Boulevard  
Los Angeles, CA 90045  
Friday, February 12 to Sunday, February 14, 2010  
7:45 AM – 5:30 PM

#### NEW YORK

The Graduate Center  
City University of New York (CUNY)  
Friday, March 19 to Sunday, March 21, 2010  
8:15 AM – 6:00 PM

#### PSYCHIATRY FOR PSYCHIATRISTS

**Andrea J. Weiss, MD and David Myland Kaufman, MD**

This two-day course will be a pre-test that complements standard psychiatry review courses and completes the review in *Clinical Neurology for Psychiatrists*. An expert group of faculty who are experienced and well-informed about modern psychiatry and test-taking strategies present essential information through a series of test-type questions utilizing an audience response system and using answers for discussions and explanations.

AMA Statement: Albert Einstein College of Medicine designates this educational activity for a maximum of 16 AMA PRA Category 1 Credit(s).™ Physicians should only claim credit commensurate with the extent of their participation in the activity.

#### LOS ANGELES

The Westin Hotel at the Los Angeles Airport  
5400 West Century Boulevard  
Los Angeles, CA 90045  
Monday, February 15 to Tuesday, February 16, 2010  
7:45 AM – 5:30 PM

#### NEW YORK

The Graduate Center  
City University of New York (CUNY)  
Monday, March 22 to Tuesday, March 23, 2010  
8:15 AM – 6:00 PM

### MAINTENANCE OF CERTIFICATION COURSES

#### THE PSYCHIATRY RECERT COURSE

**Dan Smuckler, MD, Andrea J. Weiss, MD and David Myland Kaufman, MD**

This intensive two-day course designed for psychiatrists reviews the psychiatric information likely to appear on the recertification examination. It will cover current evidence-based treatments for psychiatric disorders, emphasizing clinical matters and advances in diagnosis and treatment. Presentation of the material will be in a mixed format, with both lecture and question-and-answer utilizing audience response system keypads.

AMA Statement: Albert Einstein College of Medicine designates this educational activity for a maximum of 14.5 AMA PRA Category 1 Credit(s).™ Physicians should only claim credit commensurate with the extent of their participation in the activity.

#### NEW YORK

SUNY College of Optometry  
Joseph and Roberta Schwarz Theater  
33 West 42nd Street  
(Between 5th and 6th Avenues)  
New York, NY 10036  
Friday, January 8 to Saturday, January 9, 2010  
7:45 AM – 6:00 PM

#### THE CHILD AND ADOLESCENT PSYCHIATRY RECERT COURSE

**Audrey Walker, MD, Andrea J. Weiss, MD and David Myland Kaufman, MD**

This intensive one-day course designed for child and adolescent psychiatrists reviews material likely to be on the recertification examination and provides an update on the diagnosis and treatment of children and adolescents with psychiatric disorders. Presentations are given in a mixed format, with both lecture and question-and-answers utilizing an audience response system. Faculty discuss responses to questions and from there review the content.

AMA Statement: Albert Einstein College of Medicine designates this educational activity for a maximum of 7.5 AMA PRA Category 1 Credit(s).™ Physicians should only claim credit commensurate with the extent of their participation in the activity.

#### NEW YORK

SUNY College of Optometry  
Joseph and Roberta Schwarz Theater  
33 West 42nd Street  
(Between 5th and 6th Avenues)  
New York, NY 10036  
Sunday, January 10, 2010  
7:45 AM – 6:00 PM

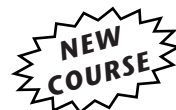

#### FOR MORE INFORMATION

• Web site Course Information or To Register: [www.cnfp.org](http://www.cnfp.org)  
• Write: CCME, 3301 Bainbridge Avenue, Bronx, NY 10467

• E-mail: [cme@montefiore.org](mailto:cme@montefiore.org)  
• Call: 718-920-6674 • Fax: 718-798-2336



# MORE THAN A PRESCRIPTION. IT'S A PLAN FOR QUITTING.

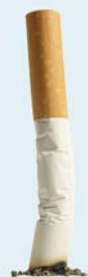

**CHANTIX**<sup>®</sup>  
(varenicline) TABLETS

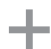

GET  <sup>®</sup> Plan

Recommend free personalized support with every CHANTIX prescription.

You play an important role in helping your patients quit smoking, but you can't be there at every step to provide behavioral support. That's why the GETQUIT Plan was created. GETQUIT is on call to help provide smoking cessation follow-up and 24/7 personalized online and phone support. It's free for patients taking CHANTIX. So why not offer these benefits with every prescription?

Learn more at [www.getquit.com](http://www.getquit.com).

CHANTIX is indicated as an aid to smoking cessation treatment in adults 18 and over. Patients may benefit from behavioral modification and support during their quit attempt. Patients should be encouraged to continue to attempt to quit if they have early lapses after quit day.

#### IMPORTANT SAFETY INFORMATION

All patients being treated with CHANTIX should be observed for neuropsychiatric symptoms including changes in behavior, hostility, agitation, depressed mood, and suicide-related events, including ideation, behavior, and attempted suicide. These symptoms, as well as worsening of pre-existing psychiatric illness and completed suicide have been reported in some patients attempting to quit smoking while taking CHANTIX in the post-marketing experience.

These events have occurred in patients with and without pre-existing psychiatric disease. Patients with serious psychiatric illness such as schizophrenia, bipolar disorder, and major depressive disorder

did not participate in the pre-marketing studies of CHANTIX and the safety and efficacy of CHANTIX in such patients has not been established.

Advise patients and caregivers that the patient should stop taking CHANTIX and contact a healthcare provider immediately if agitation, hostility, depressed mood, or changes in behavior or thinking that are not typical for the patient are observed, or if the patient develops suicidal ideation or suicidal behavior. In many post-marketing cases, resolution of symptoms after discontinuation of CHANTIX was reported, although in some cases the symptoms persisted; therefore, ongoing monitoring and supportive care should be provided until symptoms resolve.

[www.pfizerpro.com/chantix](http://www.pfizerpro.com/chantix)

*Please see accompanying brief summary of Prescribing Information.*

# WHEN IT COMES TO QUITTING SMOKING, WHAT ARE YOUR PATIENTS *NOT* TELLING YOU?

With smoking bans and cigarette taxes on the rise, smoking is becoming more of a burden each year, and smokers are feeling the effects.<sup>1,2</sup> Of the **45 million people that still smoke today, 70% want to quit.** Unfortunately, many don't know how to talk about it.<sup>3</sup>

Over 50% of patients who want to quit aren't talking to you about it.<sup>4</sup>

Even if your patients are thinking about quitting, some may not know how to bring it up. In a recent survey, 82% of smokers said they would feel comfortable asking their physicians about quitting smoking.<sup>4</sup> Yet of those smokers who were thinking about quitting, more than half never asked their physicians for help.

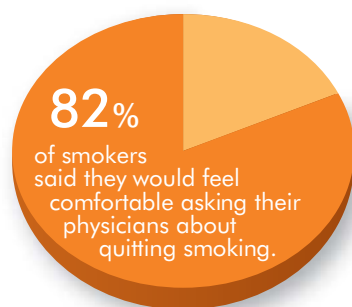

You can help make a difference in minutes.

As a physician, you are in a unique position to help encourage your patients to quit smoking. Research shows that a brief discussion can go a long way. Even a smoking cessation conversation of 3 minutes has been shown to increase quit rates.<sup>3</sup>

Two questions may help start the quit conversation.

You can initiate the conversation by assessing how ready your patient is to quit. Start by asking these questions:

1. On a scale of 1 to 10 how important is it for you to stop smoking? (Importance Score)
2. On a scale of 1 to 10 how confident are you in your ability to quit? (Confidence Score)

Chances are, your patients will have a higher Importance Score. Ask them why. It's a simple way to gauge their reasons for quitting. Then, ask your patients why they didn't have a lower Confidence Score. For example, if your patient chooses a 5, ask why they didn't choose a 3 or 4. It's a good way to begin the dialogue about quitting, and it can help patients realize how ready they may be to quit.<sup>3</sup>

The US Department of Health and Human Services recognizes the need for behavioral support.

Even with treatment, quitting smoking can be a challenge.<sup>5</sup> Giving your patients the support they need once they leave your office may help them stay motivated to achieve their goal. The PHS guidelines state that medication combined with support is more effective in quitting smoking than either alone.<sup>3</sup>

Give your patients a plan with their prescription.

The GETQUIT<sup>®</sup> Plan is one type of behavioral support, and it's available for free to your CHANTIX<sup>®</sup> (varenicline) patients. CHANTIX helps reduce the urge to smoke<sup>6</sup> and GETQUIT helps your patients overcome behavioral challenges by providing a plan for quitting. It's a two-part approach to quitting.

**GETQUIT is on call to help provide smoking cessation follow-up and support.**

The GETQUIT Plan is a full year of free, 24/7 online and phone support designed to help you support your patients as they quit smoking. GETQUIT includes:

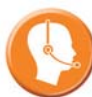

**Trained, professional support.**

If your patients are having an urge, and you're not available, they can call a GETQUIT Coach for professional, empathetic support.

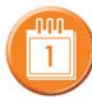

**Patient follow-up.**

GETQUIT tracks your patients' progress and answers questions they may have forgotten to ask during your visit.

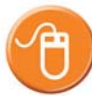

**Customizable support.**

To help your patients stay motivated, GETQUIT lets them choose their level of participation and the type of support they prefer to receive — online or by phone.

Nearly 80% of CHANTIX® (varenicline) patients found GETQUIT to be helpful in a recent survey.<sup>7</sup>

Many CHANTIX patients have already used GETQUIT, and here are just a few things they've had to say:

“ ONLY smokers/former smokers know what this process entails. The GETQUIT Plan knows, too. Thanks for knowing what to say or suggest at each step of the way. ”

“ Daily check-ins, online support, and CHANTIX. What a combo. ”

“ It worked for me, and this support, both web-based and phone service, was truly a huge help. Thanks. ”

### Encourage patients to enroll as soon as you write a prescription.

**CHANTIX**  
(varenicline) TABLETS

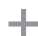

GET  Plan

GETQUIT is designed to help you continue the support you already provide, and it's free with every CHANTIX prescription. So why not provide your patients extra support at no extra cost?

Enrolling is easy. After you write a CHANTIX prescription, simply ask your patients to visit [www.getquit.com](http://www.getquit.com) or to call 1-800-566-3315.

**References:** **1.** Centers for Disease Control and Prevention. Higher Cost of Tobacco Products, Cigarettes Increases Quit Attempts. Updated April 2009. [http://www.cdc.gov/tobacco/tax\\_increase/](http://www.cdc.gov/tobacco/tax_increase/). Accessed May 5, 2009. **2.** Centers for Disease Control and Prevention. State Smoke Free Indoor Air Fact Sheet. State Tobacco Activities Tracking & Evaluation. <http://apps.nccd.cdc.gov/statesystem/publications/STATESystemFactSheetSmokefree.pdf>. Accessed May 14, 2009. **3.** Fiore MC, Jaén CR, Baker TB, et al. Treating Tobacco Use and Dependence: 2008 Update. Clinical Practice Guideline. Rockville, MD: U.S. Department of Health and Human Services. Public Health Service. May 2008. [http://www.surgeongeneral.gov/tobacco/treating\\_tobacco\\_use08.pdf](http://www.surgeongeneral.gov/tobacco/treating_tobacco_use08.pdf). Accessed August 4, 2008. **4.** American Cancer Society. Guide to Quitting Smoking. Revised October 27, 2006. [http://www.cancer.org/docroot/PED/content/PED\\_10\\_13X\\_Guide\\_for\\_Quitting\\_Smoking.asp?sit](http://www.cancer.org/docroot/PED/content/PED_10_13X_Guide_for_Quitting_Smoking.asp?sit). Accessed May 8, 2007. **5.** American Legacy Foundation, Pfizer, and Harris Interactive. Survey: Smokers' Perceptions of Healthcare Providers. January 2009. **6.** Pfizer. CHANTIX Prescribing Information. June 30, 2009. **7.** Pfizer. GETQUIT Program Evaluation Study Report. Conducted by ORC Guideline. June 15, 2009.

### IMPORTANT SAFETY INFORMATION

All patients being treated with CHANTIX should be observed for neuropsychiatric symptoms including changes in behavior, hostility, agitation, depressed mood, and suicide-related events, including ideation, behavior, and attempted suicide. These symptoms, as well as worsening of pre-existing psychiatric illness and completed suicide have been reported in some patients attempting to quit smoking while taking CHANTIX in the post-marketing experience.

These events have occurred in patients with and without pre-existing psychiatric disease. Patients with serious psychiatric illness such as schizophrenia, bipolar disorder, and major depressive disorder did not participate in the pre-marketing studies of CHANTIX and the safety and efficacy of CHANTIX in such patients has not been established.

Advise patients and caregivers that the patient should stop taking CHANTIX and contact a healthcare provider immediately if agitation, hostility, depressed mood, or changes in behavior or thinking that are not typical for the patient are observed, or if the patient develops suicidal ideation or suicidal behavior. In many post-marketing cases, resolution of symptoms after discontinuation of CHANTIX was reported, although in some cases the symptoms persisted; therefore, ongoing monitoring and supportive care should be provided until symptoms resolve.

Patients should be informed that there have been reports of serious skin reactions, such as Stevens Johnson Syndrome and Erythema Multiforme and of angioedema, with swelling of the face, mouth, and neck that can lead to life-threatening respiratory compromise. Patients should be instructed to discontinue CHANTIX and immediately seek medical care if they experience these symptoms or at the first sign of rash with mucosal lesions or any other signs of hypersensitivity.

The most common adverse reactions include nausea (30%), sleep disturbance, constipation, flatulence, and vomiting. Patients should be informed that they may experience vivid, unusual, or strange dreams during treatment with CHANTIX. Patients should be advised to use caution driving or operating machinery or engaging in other potentially hazardous activities until they know how CHANTIX may affect them.

Safety and efficacy of CHANTIX in combination with other smoking cessation drug therapies have not been studied. Dosage adjustment with CHANTIX is recommended in patients with severe renal impairment or in patients undergoing hemodialysis.

Smoking cessation, with or without treatment with CHANTIX, may alter the pharmacokinetics or pharmacodynamics of some drugs, such as theophylline, warfarin, and insulin. Dosage adjustment for these drugs may be necessary.

[www.pfizerpro.com/chantix](http://www.pfizerpro.com/chantix) Please see accompanying brief summary of Prescribing Information.



though several of the most common events were reported by a greater proportion of patients. Nausea, for instance, was reported in 40% of patients treated with CHANTIX 1 mg BID in a one-year study, compared to 8% of placebo-treated patients.

Following is a list of treatment-emergent adverse events reported by patients treated with CHANTIX during all clinical trials. The listing does not include those events already listed in the previous tables or elsewhere in labeling, those events for which a drug cause was remote, those events which were so general as to be uninformative, and those events reported only once which did not have a substantial probability of being acutely life-threatening. **BLOOD AND LYMPHATIC SYSTEM DISORDERS.** *Infrequent:* Anemia, Lymphadenopathy. *Rare:* Leukocytosis, Thrombocytopenia, Splenomegaly. **CARDIAC DISORDERS.** *Infrequent:* Angina pectoris, Arrhythmia, Bradycardia, Ventricular extrasystoles, Myocardial infarction, Palpitations, Tachycardia. *Rare:* Atrial fibrillation, Cardiac flutter, Coronary artery disease, Cor pulmonale, Acute coronary syndrome. **EAR AND LABYRINTH DISORDERS.** *Infrequent:* Tinnitus, Vertigo. *Rare:* Deafness, Meniere's disease. **ENDOCRINE DISORDERS.** *Infrequent:* Thyroid gland disorders. **EYE DISORDERS.** *Infrequent:* Conjunctivitis, Dry eye, Eye irritation, Vision blurred, Visual disturbance, Eye pain. *Rare:* Acquired night blindness, Blindness transient, Cataract subcapsular, Ocular vascular disorder, Photophobia, Vitreous floaters. **GASTROINTESTINAL DISORDERS.** *Frequent:* Diarrhea, Gingivitis. *Infrequent:* Dysphagia, Enterocolitis, Eructation, Gastritis, Gastrointestinal hemorrhage, Mouth ulceration, Esophagitis. *Rare:* Gastric ulcer, Intestinal obstruction, Pancreatitis acute. **GENERAL DISORDERS AND ADMINISTRATION SITE CONDITIONS.** *Frequent:* Chest pain, Influenza like illness, Edema, Thirst. *Infrequent:* Chest discomfort, Chills, Pyrexia. **HEPATOBIILIARY DISORDERS.** *Infrequent:* Gall bladder disorder. **IMMUNE SYSTEM DISORDERS.** *Infrequent:* Hypersensitivity. *Rare:* Drug hypersensitivity, **INVESTIGATIONS.** *Frequent:* Liver function test abnormal. *Infrequent:* Electrocardiogram abnormal, Muscle enzyme increased, Urine analysis abnormal. **METABOLISM AND NUTRITION DISORDERS.** *Infrequent:* Diabetes mellitus, Hyperlipidemia. *Rare:* Hyperkalemia, Hypoglycemia. **MUSCULOSKELETAL AND CONNECTIVE TISSUE DISORDERS.** *Frequent:* Arthralgia, Back pain, Muscle cramp, Musculoskeletal pain, Myalgia. *Infrequent:* Arthritis, Osteoporosis. *Rare:* Myositis. **NERVOUS SYSTEM DISORDERS.** *Frequent:* Disturbance in attention, Dizziness, Sensory disturbance. *Rare:* Amnesia, Migraine, Parosmia, Psychomotor hyperactivity, Restless legs syndrome, Syncope, Tremor. *Rare:* Balance disorder, Cerebrovascular accident, Convulsion, Dysarthria, Facial palsy, Mental impairment, Multiple sclerosis, Nystagmus, Psychomotor skills impaired, Transient ischemic attack, Visual field defect. **PSYCHIATRIC DISORDERS.** *Frequent:* Anxiety, Depression, Emotional disorder, Irritability, Restlessness. *Infrequent:* Aggression, Agitation, Disorientation, Dissociation, Libido decreased, Mood swings, Thinking abnormal. *Rare:* Bradyphrenia, Euphoric mood, Hallucinations, Psychotic disorder, Suicidal ideation. **RENAL AND URINARY DISORDERS.** *Frequent:* Polyuria. *Infrequent:* Nephrothiasis, Nocturia, Urine abnormality, Urethral syndrome. *Rare:* Renal failure acute, Urinary retention. **REPRODUCTIVE SYSTEM AND BREAST DISORDERS.** *Frequent:* Menstrual disorder. *Infrequent:* Erectile dysfunction. *Rare:* Sexual dysfunction. **RESPIRATORY, THORACIC AND MEDIASTINAL DISORDERS.** *Frequent:* Epistaxis. *Infrequent:* Respiratory disorders. *Infrequent:* Asthma. *Rare:* Pleurisy, Pulmonary embolism. **SKIN AND SUBCUTANEOUS TISSUE DISORDERS.** *Frequent:* Hyperhidrosis. *Infrequent:* Acne, Dermatitis, Dry skin, Eczema, Erythema, Psoriasis, Urticaria. *Rare:* Photosensitivity reaction. **VASCULAR DISORDERS.** *Frequent:* Hot flush, Hypertension. *Infrequent:* Hypotension, Peripheral ischemia, Thrombosis.

**Post-Marketing Experience:**

The following adverse events have been reported during post-approval use of CHANTIX. Because these events are reported voluntarily from a population of uncertain size, it is not possible to reliably estimate their frequency or establish a causal relationship to drug exposure. There have been reports of depression, mania, psychosis, hallucinations, paranoia, delusions, homicidal ideation, aggression, hostility, anxiety, and panic, as well as suicidal ideation, suicide attempt, and completed suicide in patients attempting to quit smoking while taking CHANTIX (See **Boxed Warning, WARNINGS/Neuropsychiatric Symptoms and Suicidality, PRECAUTIONS/Information for Patients**). Smoking cessation with or without treatment is associated with nicotine withdrawal symptoms and the exacerbation of underlying psychiatric illness. Not all patients had known pre-existing psychiatric illness and not all had discontinued smoking.

There have been reports of hypersensitivity reactions, including angioedema (See **WARNINGS and PRECAUTIONS**). There have also been reports of serious skin reactions, including Stevens Johnson Syndrome and Erythema Multiforme in patients taking CHANTIX (See **WARNINGS and PRECAUTIONS**).

**DRUG ABUSE AND DEPENDENCE**

**Controlled Substance Class** Varenicline is not a controlled substance. **Humans:** Fewer than 1 out of 1000 patients reported euphoria in clinical trials with CHANTIX. At higher doses (greater than 2 mg), CHANTIX produced more frequent reports of gastrointestinal disturbances such as nausea and vomiting. There is no evidence of dose-escalation to maintain therapeutic effects in clinical studies, which suggests that tolerance does not develop. Abrupt discontinuation of CHANTIX was associated with an increase in irritability and sleep disturbances in up to 3% of patients. This suggests that, in some patients, varenicline may produce mild physical dependence which is not associated with addiction. In a human laboratory abuse liability study, a single oral dose of 1 mg varenicline did not produce any significant positive or negative subjective responses in smokers. In non-smokers, 1 mg varenicline produced an increase in some positive subjective effects, but this was accompanied by an increase in negative adverse effects, especially nausea. A single oral dose

of 3 mg varenicline uniformly produced unpleasant subjective responses in both smokers and non-smokers. **Animals:** Studies in rodents have shown that varenicline produces behavioral responses similar to those produced by nicotine. In rats trained to discriminate nicotine from saline, varenicline produced full generalization to the nicotine cue. In self-administration studies, the degree to which varenicline substitutes for nicotine is dependent upon the requirement of the task. Rats trained to self-administer nicotine under easy conditions continued to self-administer varenicline to a degree comparable to that of nicotine, however in a more demanding task, rats self-administered varenicline to a lesser extent than nicotine. Varenicline pretreatment also reduced nicotine self-administration.

**OVERDOSAGE**

In case of overdose, standard supportive measures should be instituted as required. Varenicline has been shown to be dialyzed in patients with end stage renal disease (see **CLINICAL PHARMACOLOGY, Pharmacokinetics, Pharmacokinetics in Special Patient Populations**), however, there is no experience in dialysis following overdose.

**DOSAGE AND ADMINISTRATION**

**Usual Dosage for Adults** Smoking cessation therapies are more likely to succeed for patients who are motivated to stop smoking and who are provided additional advice and support. Patients should be provided with appropriate educational materials and counseling to support the quit attempt. The patient should set a date to stop smoking. CHANTIX dosing should start one week before this date. CHANTIX should be taken after eating and with a full glass of water. The recommended dose of CHANTIX is 1 mg twice daily following a 1-week titration as follows:

|                          |                    |
|--------------------------|--------------------|
| Days 1–3:                | 0.5 mg once daily  |
| Days 4–7:                | 0.5 mg twice daily |
| Days 8–End of treatment: | 1 mg twice daily   |

Patients who cannot tolerate adverse effects of CHANTIX may have the dose lowered temporarily or permanently. Patients should be treated with CHANTIX for 12 weeks. For patients who have successfully stopped smoking at the end of 12 weeks, an additional course of 12 weeks treatment with CHANTIX is recommended to further increase the likelihood of long-term abstinence. Patients who do not succeed in stopping smoking during 12 weeks of initial therapy, or who relapse after treatment, should be encouraged to make another attempt once factors contributing to the failed attempt have been identified and addressed.

**Special Populations**

**Patients with impaired renal function** No dosage adjustment is necessary for patients with mild to moderate renal impairment. For patients with severe renal impairment, the recommended starting dose of CHANTIX is 0.5 mg once daily. Patients may then titrate as needed to a maximum dose of 0.5 mg twice a day. For patients with end-stage renal disease undergoing hemodialysis, a maximum dose of 0.5 mg once daily may be administered if tolerated well (See **CLINICAL PHARMACOLOGY, Pharmacokinetics, Pharmacokinetics in Special Populations, Renal Impairment**).

**Dosing in elderly patients and patients with impaired hepatic function** No dosage adjustment is necessary for patients with hepatic impairment. Because elderly patients are more likely to have decreased renal function, care should be taken in dose selection, and it may be useful to monitor renal function (See **PRECAUTIONS, Geriatric Use**).

**Use in children** Safety and effectiveness of CHANTIX in pediatric patients have not been established; therefore, CHANTIX is not recommended for use in patients under 18 years of age.

Please see CHANTIX full Prescribing Information and patient Medication Guide at [www.pfizerpro.com/chantix](http://www.pfizerpro.com/chantix).

Rx only

July 2009, Version 4.0

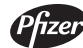

VPC00673A © 2009 Pfizer Inc. All rights reserved. Printed in USA/December 2009

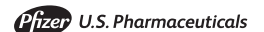

**Candidates and Employers  
Connect through the  
APA Job Bank**  
[psych.org/jobbank](http://psych.org/jobbank)

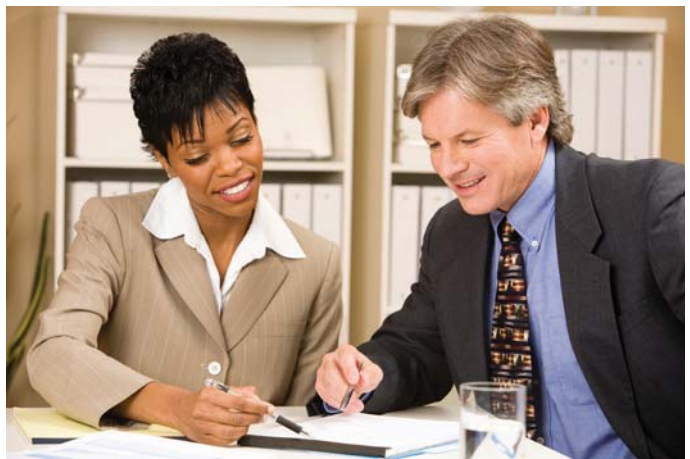

**Candidates**

- Search the most comprehensive online listing of psychiatric positions at [psych.org/jobbank](http://psych.org/jobbank).
- Register to post your resume, receive instant job alerts, use the career tools and more.
- Visit the APA Job Bank to find the ideal position!

**Employers**

- Use the many resources of the APA Job Bank to meet qualified candidates and make a smart recruitment decision.
- Advertise in the *Psychiatric News* or *Psychiatric Services* classifieds and the APA Job Bank and receive a 10% discount on each.

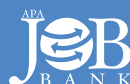

The best source for psychiatric job placement

For more information, contact Alice Kim at 703-907-7330 or [classads@psych.org](mailto:classads@psych.org)

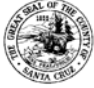

County of Santa Cruz  
Employment Opportunity

# PSYCHIATRIST

Salary: \$160,139 – 173,264 Annually

Santa Cruz County is seeking staff Psychiatrists to join their Mental Health and Substance Abuse Services (MHSAS) division to ensure new community resources and opportunities for recovery and resiliency in this small coastal community in Northern California. MHSAS is part of a large Health Services Agency that provides a broad range of services for mental health care. The County is known for having many innovative programs and a strong history of effective collaboration.

For job details and/or to apply, please visit [www.santacruzcountyjobs.com](http://www.santacruzcountyjobs.com) and click on the Psychiatrist job title. For any questions and/or to learn more about this position contact Dr. Charles Lewis Johnson, M.D. by calling (831) 454-5468.

## SAM-certified Internist or Psychiatrist

Coatesville Veterans Affairs Medical Center, an affiliate with Drexel University School of Medicine, seeks a full-time SAM-certified internist or psychiatrist to oversee substance abuse services in the medical center. The incumbent will provide direct patient care and have administrative and supervisory responsibilities for the following substance abuse services; inpatient detox, substance abuse rehabilitation, residential program, outpatient buprenorphine program, and the development of an outpatient detox program. Applicants must possess USA citizenship and be board-certified in internal medicine or psychiatry. Coatesville VAMC offers excellent federal benefits, competitive salaries and a faculty appointment. Incentive pay will be considered. Coatesville VAMC is located in a scenic environment in close proximity to Philadelphia.

**Please contact:**

**Theresa Englerth**  
**Human Resources Specialist**  
**Coatesville VAMC**  
**610-384-7711 x-4680**  
**[Theresa.Englerth@va.gov](mailto:Theresa.Englerth@va.gov)**

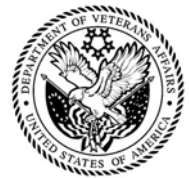

## Adult Psychiatrist

Saint Louis University, a Catholic, Jesuit institution dedicated to student learning, research, health care, and service is seeking applicants for a tenure-track and non-tenure track appointments in the newly formed Department of Neurology & Psychiatry beginning immediately. The position is offered at open rank, appointment level commensurate with academic accomplishment.

This clinically-oriented, full time position emphasizes inpatient psychiatry services and offers the opportunity to see adult patients on an outpatient basis. This position will also have the opportunity to work offsite performing psychiatry services to our community-based contract partners. Based at the Health Sciences Center campus, all faculty have ample opportunity to be involved in teaching medical students and psychiatric residents. Support for research is available. Applicant must be BC/BE. Generous benefits, including excellent retirement package and tuition remission at SLU.

Demonstrated academic record of excellence in patient care, teaching and research is desirable. Must be legally authorized to work in the USA. Position requires a background check for the successful candidate.

Interested candidates must submit a cover letter, application, and current curriculum vitae to <http://jobs.slu.edu>.

Please send Curriculum Vitae, representative publications, description of research plans, statement of teaching and philosophy, and letters of reference to:

Henry Kaminski, M.D.  
Chair, Department of Neurology & Psychiatry  
1438 South Grand Blvd.  
St. Louis, MO 63104  
[hkaminsk@slu.edu](mailto:hkaminsk@slu.edu)

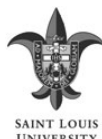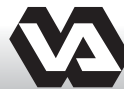

## Department of Veterans Affairs

**Director of Residency Training**  
**Harvard South Shore Psychiatry Residency Training Program**  
**Department of Psychiatry Harvard Medical School**  
**&**  
**The VA Boston Healthcare System**

Harvard Medical School and the VA Boston Healthcare System are recruiting a Training Director for the Harvard South Shore Psychiatry Residency Training Program (HSS). The Harvard Department of Psychiatry at the VA Boston Healthcare System has undergone a major expansion of teaching, research, and academic clinical programming over the past two years. The current Training Director is assuming the duties of Departmental Chair for Academic Development, which will include ongoing support to HSS including teaching, supervision, and consultative support to the incoming Training Director.

HSS is a consortium program affiliated with Harvard Medical School and sponsored by the VA Boston Healthcare System. Residents rotate among three Boston VA campuses, other Harvard-affiliated training hospitals, and Massachusetts Department of Mental Health facilities. HSS receives stable funding for 32 PGY I-IV resident positions plus ample administrative support, not dependent on GME pass-through funding. Major foci of program excellence include biopsychosocial assessment and interviewing skills, academic development in research, teaching and leadership, evidence-based pharmacotherapy, and manual-guided psychotherapies. Comprehensive program description can be found at [www.harvardsouthshorepsychiatry.org](http://www.harvardsouthshorepsychiatry.org).

The competitive Training Director candidate will have strong academic credentials, residency administration experience at the site or program level, and demonstrated scholarly ability in a relevant field. The applicant must be board-certified in psychiatry with a minimum of 5 years of post-residency experience, and is expected to qualify for a Harvard Medical School appointment at the Assistant or Associate Professor level.

This position offers a highly competitive federal salary and benefits. VA Boston is an Affirmative Action / Equal Opportunity Employer, and women and individuals from health-underserved minority populations are encouraged to apply.

To apply, candidates should send a letter of interest, CV, and the names of three persons to contact for references to:

**Drs. Mark Bauer & Gary Kaplan, Search Committee Co-Chairs**  
**940 Belmont Street, Brockton, MA 02301; or email materials to:**  
**[Eugene.Francois@va.gov](mailto:Eugene.Francois@va.gov) with a copy to [vhabhsjobs@med.va.gov](mailto:vhabhsjobs@med.va.gov)**

## Enjoy Quality of Life...Practice Quality Medicine...

**McLeod Health Behavioral Health Psychiatric Center** is located in the beautiful southern town of Darlington, SC- a quick 45 minute drive to our state capital, Columbia, SC, and a 2 Hour drive to Charleston, SC and Charlotte, NC. We are looking for two BC/BE Psychiatrists with an innovative approach to medicine. Duties will include inpatient, outpatient, and Consult Services. Depending on the Physician's strengths, the Physician will perform any combination of these duties. Other features of the position include:

*Flexible schedule with limited call*

*New state of the art facility with 23 inpatient beds*

*24 hour Access Center with an experienced staff*

*Great potential for program growth and development*

We offer a competitive salary, comprehensive benefits and retirement package, paid time off, paid professional liability insurance, CME allowance, relocation assistance, and sign on bonus.

**McLeod** is a leader in the healthcare industry. We are committed to developing patient-centered, evidence-based, physician-led, quality health care in a not-for-profit hospital system that values each individual patient.

**Don't miss an opportunity to become a staff physician with a leader in healthcare!** Please contact Tiffany Ellington, Director of Physician Recruitment, at [mcleodphysicianrecruiting.org](http://mcleodphysicianrecruiting.org) or 843-777-5169.

## ATASCADERO STATE HOSPITAL

### BE/BC Psychiatrist

Atascadero State Hospital now pays board certified psychiatrists starting at \$223,464 and advancing stepwise to \$255,732. Atascadero is the nation's premier center for the treatment of forensically committed mentally ill patients. Our hospital is a teaching site affiliated with the University of California, accredited by JCAHO, and recipient of the prestigious Codman Award. All of our psychiatrists are board eligible and most are board certified. Many of our psychiatrists have forensic subspecialty boards.

We are located midway between San Francisco and Los Angeles on the scenic central California Coast, south of Big Sur. We offer a spectacularly beautiful environment in San Luis Obispo County with temperate climate, beaches, world class wineries, cultural activities, golfing, sailing, riding, clean air, and excellent schools through the University level.

Our benefit package is valued at an additional 30%, which includes retirement plans (including safety retirement), health plans, professional liability coverage, paid holidays, educational leave, and generous annual leave. On-call duty is compensated hour for hour over and above the base salary. Applicants must hold a current California license, or have pending application with the Medical Board of California.

For a prompt and confidential review, send CV to:

**Jeanne Garcia, M.D.**

P. O. Box 7001

Atascadero, CA 93423-7001

(805) 468-2005 or fax (805) 468-2138

or e-mail us: [jeanne.garcia@ash.dmh.ca.gov](mailto:jeanne.garcia@ash.dmh.ca.gov)

WE ARE AN EQUAL OPPORTUNITY EMPLOYER.

## The Best Care - The Best Career

### Veterans Affairs Medical Center San Francisco

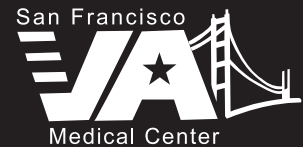

## Postdoctoral Research Fellowship Program

The San Francisco VAMC is recruiting for the two-year MIRECC Postdoctoral Research Fellowship Program in PTSD and Dementia affiliated with the University of California, San Francisco. This interdisciplinary program aims to train physicians with an interest in mental health research and residency training from a broad range of specialties (e.g., psychiatry, neurology, geriatrics, internal medicine) to become outstanding translational and clinical researchers in high priority areas of mental health. Individualized, mentored research and clinical training is combined with a state-of-the-art curriculum that emphasizes research methods, statistics, epidemiology, mental health systems, quality improvement methods, education, and service delivery. Nationally, over 20 fellowship sites are linked electronically for didactic, academic, and research efforts. Fellows devote 75% of their time to research and education activities and 25% to clinical training. In collaboration with their mentors, Fellows will develop and implement a research project, publish and present findings, participate in grant writing, and utilize the latest technology for educational activities and clinical service delivery. Fellows may conduct research in the areas of PTSD, dementia, or both. Fellowships will begin between July 1 and September 30, 2010.

Applicants must have completed ACGME accredited residency training, be board eligible or board certified, and have an active, unrestricted license to practice in California. International medical graduates must also have a current visa and an ECFMG certificate that is valid indefinitely. Applicants on a J-1 visa must have current ECFMG sponsorship as well. The VA funds Fellows' stipends in amounts based on previously completed ACGME accredited residency training. To apply for this fellowship, contact the Psychiatry Fellowship Program Director, Kristine Yaffe, M.D. at [kristine.yaffe@ucsf.edu](mailto:kristine.yaffe@ucsf.edu).

VA is an Equal Opportunity/Affirmative Action Employer. All qualified applicants are encouraged to apply, including minorities and women. VA seeks candidates whose experience, teaching, research, or community service has prepared them to contribute to our commitment to diversity and excellence.

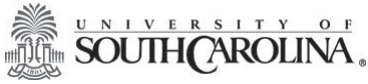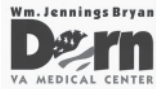

**The University Of South Carolina School Of Medicine and the Dorn Veterans Administration Medical Center** are recruiting an outstanding person to lead a new Division of Psychiatry. The division will be closely affiliated with the Department of Psychiatry at the University Of South Carolina School Of Medicine. The person will be the Director of Psychiatry at the Dorn Veterans Administration Medical Center and serve as Vice Chair of Veterans Affairs at the Department of Psychiatry at the University of South Carolina School Of Medicine.

The Dorn Veterans Administration Medical Center is undergoing a rapid expansion of missions in education, research, and clinical care. Currently the division has active clinical units in the main facility as well as seven distinct outpatient facilities. Novel programming includes integrated primary care/mental health and telemedicine. Significant resources include staffing grants, physician and support staff positions, expanded space in existing plus planned facilities, and research capabilities at both institutions.

The successful candidate will be a highly skilled, energetic, goal-oriented individual with background in Psychiatry, Psychology, Social Work, or Nursing who possesses strong inter-personal skills, division level experience, research and grant accomplishment, and an academic track record.

**Please respond with a letter of inquiry and CV to:**  
Human Resources (05M), WJB Dorn VA Medical Center  
6439 Garners Ferry Road, Columbia, SC 29209

**Contact:** Therese Mazloom at 803-776-4000 ext 6264 **OR** Dr. Stephen J. Hawes, Jr. at 803-776-4000 ext 6818

## Special Offer for APA Members

**\$84 APA Member Subscription to *Psychiatric Services***

**One low price covers your print and online subscription**

**25% off the nonmember price!**

Each issue covers an array of topics, with a focus on people with serious mental illness:

- Evidence-based and best practices: delivering effective services and programs
- Recovery-oriented, client-centered care: how systems are being transformed
- Racial-ethnic disparities in care: how they arise and how to overcome them
- Criminal justice involvement and homelessness: diversion and housing programs
- Use of medications: improving adherence, monitoring trends and treatment adequacy
- Medicaid changes and recent court cases: what they mean for your practice

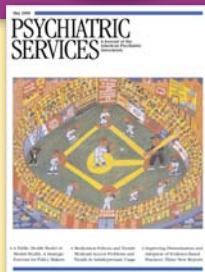

**For more information or to subscribe,**

**visit [www.appi.org](http://www.appi.org) or call Customer Service at 1-800-368-5777**

Order today and make sure that you don't miss an issue!

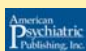

The First and Last Word in Psychiatry

Priority Code AH911R2

## Index to AdvertisERS January 2010

The publication of an advertisement in this journal does not imply endorsement of the product or service by the American Psychiatric Association.

Albert Einstein College of Medicine .....A21

Employment Opportunities .....A33-A35

Janssen Pharmaceutica

Invega .....A14-A20

Johns Hopkins University Press .....A20

Novartis

Fanapt.....A13

The Osler Institute ..... A9

University of Pittsburg Medical Center ..... A2

U.S. Pharmaceuticals, Pfizer Inc.

Chantix..... A6-A9; A27-A31

Geodon ..... C2-A1

Pristiq .....A36-C4



## Subscription and Business Information

The American Journal of Psychiatry, ISSN 0002-953X, is published monthly by the American Psychiatric Association, 1000 Wilson Blvd., Suite 1825, Arlington, VA 22209-3901. Subscriptions (per year): individual \$230.00, international \$347.00. For additional subscription options, including single issues and student rates, please contact Customer Service at 1-800-368-5777 or email [appi@psych.org](mailto:appi@psych.org). Institutional subscriptions are tier priced. For institutional site license or pricing information, contact 703-907-8538 or email [institutions@psych.org](mailto:institutions@psych.org).

Business communications, address changes, and subscription questions from APA members should be directed to the Division of Member Services: (888) 35-PSYCH (toll-free). Nonmember subscribers should call the Circulation Department (800) 368-5777. Author inquiries should be directed to the Journal editorial office: (703) 907-7885 or (703) 907-7884; fax (703) 907-1096; e-mail [ajp@psych.org](mailto:ajp@psych.org).

Business Management: Nancy Frey, Director, Publishing Services; Laura G. Abedi, Associate Director, Production; Alison Jones, Advertising Prepress Manager; Robert Pursell, Associate Publisher Advertising, Sales and Marketing.

Pharmaceutical Print Advertising: Frank Cox, Kathleen Harrison, Valentin Torres, Pharmaceutical Media, Inc. 30 East 33rd Street, New York, NY 10016. (212) 685-5010; fax (212) 685-6126; e-mail [vtorres@pminy.com](mailto:vtorres@pminy.com).

Nonpharmaceutical and Online Sales: Brian Skepton, (703) 907-7332; e-mail [bskepton@psych.org](mailto:bskepton@psych.org).

Pages are produced using Adobe InDesign CS4. Printed by RR Donnelley, Mendota, IL, on acid-free paper effective with Volume 164, Number 11, November 2007.

Periodicals postage paid at Arlington, VA, and additional mailing offices. POSTMASTER: Send address changes to The American Journal of Psychiatry, Circulation Department, American Psychiatric Association, 1000 Wilson Blvd., Suite 1825, Arlington, VA 22209-3901.

Indexed in Abstracts for Social Workers, Academic Abstracts, Biological Abstracts, Chemical Abstracts, Chicago Psychoanalytic Literature Index, Cumulative Index to Nursing Literature, Excerpta Medica, Hospital Literature Index, Index Medicus, International Nursing Index, Nutrition Abstracts, Psychological Abstracts, Science Citation Index, Social Science Source, and Social Sciences Index.

The American Psychiatric Association does not hold itself responsible for statements made in its publications by contributors or advertisers. Unless so stated, material in The American Journal of Psychiatry does not reflect the endorsement, official attitude, or position of the American Psychiatric Association or of the Journal's Editorial Board.

Authorization to photocopy items for internal or personal use, or the internal or personal use of specific clients, is granted by the American Psychiatric Association for libraries and other users registered with the Copyright Clearance Center (CCC) Transactional Reporting Service, provided that the base fee of \$15.00 per copy is paid directly to CCC, 222 Rosewood Drive, Danvers, MA 01923; (978) 750-8400 (tel), (978) 646-8600 (fax), [www.copyright.com](http://www.copyright.com) (web site). 0002-953X/05/\$15.00.

This consent does not extend to other kinds of copying, such as copying for general distribution, for advertising or promotional purposes, for creating new collective works, or for resale. Requests for commercial distribution should be directed to (703) 907-7894. APA does not require that permission be obtained for the photocopying of isolated articles for nonprofit classroom or library reserve use; all fees associated with such permission are waived.

Copyright © 2010 American Psychiatric Association.

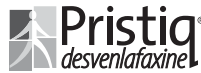

Extended-Release Tablets

**BRIEF SUMMARY.** See package insert for full Prescribing Information. For further product information and current package insert, please visit [www.wyeth.com](http://www.wyeth.com) or call our medical communications department toll-free at 1-800-934-5556.

### WARNING: Suicidality and Antidepressant Drugs

Antidepressants increased the risk compared to placebo of suicidal thinking and behavior (suicidality) in children, adolescents, and young adults in short-term studies of Major Depressive Disorder (MDD) and other psychiatric disorders. Anyone considering the use of Pristiq or any other antidepressant in a child, adolescent, or young adult must balance this risk with the clinical need. Short-term studies did not show an increase in the risk of suicidality with antidepressants compared to placebo in adults beyond age 24; there was a reduction in risk with antidepressants compared to placebo in adults aged 65 and older. Depression and certain other psychiatric disorders are themselves associated with increases in the risk of suicide. Patients of all ages who are started on antidepressant therapy should be monitored appropriately and observed closely for clinical worsening, suicidality, or unusual changes in behavior. Families and caregivers should be advised of the need for close observation and communication with the prescriber. Pristiq is not approved for use in pediatric patients [see Warnings and Precautions (5.1), Use in Specific Populations (8.4), and Patient Counseling Information (17.1 in the full prescribing information)].

**INDICATIONS AND USAGE:** Pristiq, a selective serotonin and norepinephrine reuptake inhibitor (SNRI), is indicated for the treatment of major depressive disorder (MDD).

**CONTRAINDICATIONS: Hypersensitivity**-Hypersensitivity to desvenlafaxine succinate, venlafaxine hydrochloride or to any excipients in the Pristiq formulation. **Monoamine Oxidase Inhibitors**-Pristiq must not be used concomitantly in patients taking monoamine oxidase inhibitors (MAOIs) or in patients who have taken MAOIs within the preceding 14 days due to the risk of serious, sometimes fatal, drug interactions with SNRI or SSRI treatment or with other serotonergic drugs. Based on the half-life of desvenlafaxine, at least 7 days should be allowed after stopping Pristiq before starting an MAOI [see Dosage and Administration (2.5) in the full prescribing information].

**WARNINGS AND PRECAUTIONS: Clinical Worsening and Suicide Risk**-Patients with major depressive disorder (MDD), both adult and pediatric, may experience worsening of their depression and/or the emergence of suicidal ideation and behavior (suicidality) or unusual changes in behavior, whether or not they are taking antidepressant medications, and this risk may persist until significant remission occurs. Suicide is a known risk of depression and certain other psychiatric disorders, and these disorders themselves are the strongest predictors of suicide. There has been a long-standing concern, however, that antidepressants may have a role in inducing worsening of depression and the emergence of suicidality in certain patients during the early phases of treatment. Pooled analyses of short-term placebo-controlled studies of antidepressant drugs (SNRIs and others) showed that these drugs increase the risk of suicidal thinking and behavior (suicidality) in children, adolescents, and young adults (ages 18-24) with major depressive disorder (MDD) and other psychiatric disorders. Short-term studies did not show an increase in the risk of suicidality with antidepressants compared to placebo in adults beyond age 24; there was a reduction with antidepressants compared to placebo in adults aged 65 and older. The pooled analyses of placebo-controlled studies in children and adolescents with MDD, obsessive-compulsive disorder (OCD), or other psychiatric disorders included a total of 24 short-term studies of 9 antidepressant drugs in over 4,400 patients. The pooled analyses of placebo-controlled studies in adults with MDD or other psychiatric disorders included a total of 295 short-term studies (median duration of 2 months) of 11 antidepressant drugs in over 77,000 patients. There was considerable variation in risk of suicidality among drugs, but a tendency toward an increase in the younger patients for almost all drugs studied. There were differences in absolute risk of suicidality across the different indications, with the highest incidences in MDD. The risk differences (drug vs. placebo), however, were relatively stable within age strata and across indications. These risk differences (drug-placebo differences in the number of cases of suicidality per 1000 patients treated) are provided in Table 1 of the full prescribing information. No suicides occurred in any of the pediatric studies. There were suicides in the adult studies, but the number was not sufficient to reach any conclusion about drug effect on suicide. It is unknown whether the suicidality risk extends to longer-term use, ie, beyond several months. However, there is substantial evidence from placebo-controlled maintenance studies in adults with depression that the use of antidepressants can delay the recurrence of depression. **All patients being treated with antidepressants for any indication should be monitored appropriately and observed closely for clinical worsening, suicidality, and unusual changes in behavior, especially during the initial few months of a course of drug therapy, or at times of dose changes, either increases or decreases.** The following symptoms, anxiety, agitation, panic attacks, insomnia, irritability, hostility, aggressiveness, impulsivity, akathisia (psychomotor restlessness), hypomania, and mania, have been reported in adult and pediatric patients being treated with antidepressants for major depressive disorder as well as for other indications, both psychiatric and nonpsychiatric. Although a causal link between the emergence of such symptoms and either the worsening of depression and/or the emergence of suicidal impulses has not been established, there is concern that such symptoms may represent precursors to emerging suicidality. Consideration should be given to changing the therapeutic regimen, including possibly discontinuing the medication, in patients whose depression is persistently worse, or who are experiencing emergent suicidality or symptoms that might be precursors to worsening depression or suicidality, especially if these symptoms are severe, abrupt in onset, or were not part of the patient's presenting symptoms. If the decision has been made to discontinue treatment, medication should be tapered, as rapidly as is feasible, but with recognition that abrupt discontinuation can be associated with certain symptoms [see Warnings and Precautions (5.9) and Dosage and Administration (2.3) in the full prescribing information for a description of the risks of discontinuation of Pristiq]. Families and caregivers of patients being treated with antidepressants for major depressive disorder or other indications, both psychiatric and nonpsychiatric, should be alerted about the need to monitor patients for the emergence of agitation, irritability, unusual changes in behavior, and the other symptoms described above, as well as the emergence of suicidality, and to report such symptoms immediately to health care providers. Such monitoring should include daily observation by families and caregivers. Prescriptions for Pristiq should be written for the smallest quantity of tablets consistent with good patient management, in order to reduce the risk of overdose. **Screening patients for bipolar disorder**-A major depressive episode may be the initial presentation of bipolar disorder. It is generally believed (though not established in controlled studies) that treating such an episode with an antidepressant alone may increase the likelihood of precipitation of a mixed/manic episode in patients at risk for bipolar disorder. Whether any of the symptoms described above represent such a conversion is unknown. However, prior to initiating treatment with an antidepressant, patients with depressive symptoms should be adequately screened to determine if they are at risk for bipolar disorder; such screening should include a detailed psychiatric history, including a family history of suicide, bipolar disorder, and depression. It should be noted that Pristiq is not approved for use in treating bipolar depression. **Serotonin Syndrome or Neuroleptic Malignant Syndrome (NMS)-like Reactions**-The development of a potentially life-threatening serotonin syndrome or Neuroleptic Malignant Syndrome (NMS)-like reactions have been reported with SNRIs and SSRIs alone, including Pristiq treatment, but particularly with concomitant use of serotonergic drugs (including triptans), with drugs that impair metabolism of serotonin (including MAOIs), or with antipsychotics or other dopamine antagonists. Serotonin syndrome symptoms may include mental status changes (eg, agitation, hallucinations, coma), autonomic instability (eg, tachycardia, labile blood pressure, hyperthermia), neuromuscular aberrations (eg, hyperreflexia, incoordination) and/or gastrointestinal symptoms (eg, nausea, vomiting, diarrhea). Serotonin syndrome in its most severe form can resemble neuroleptic malignant syndrome, which includes hyperthermia, muscle rigidity, autonomic instability with possible rapid fluctuation of vital signs, and mental status changes. Patients should be monitored for the emergence of serotonin syndrome or NMS-like signs and symptoms. The concomitant use of Pristiq with MAOIs intended to treat depression is contraindicated [see Contraindications (4.2)]. If concomitant treatment of Pristiq with a 5-hydroxytryptamine receptor agonist (triptan) is clinically warranted, careful observation of the patient is advised, particularly during treatment initiation and dose increases. The concomitant use of Pristiq with serotonin precursors (such as tryptophan) is not recommended. Treatment with Pristiq and any concomitant serotonergic or antiparkinsonian agents, including antipsychotics, should be discontinued immediately if the above events occur, and supportive symptomatic treatment should be initiated. **Elevated Blood Pressure**-Patients receiving Pristiq should have regular monitoring of blood pressure since dose-dependent increases were observed in clinical studies. Pre-existing hypertension should be controlled before initiating treatment with Pristiq. Caution should be exercised in treating patients with pre-existing hypertension or other underlying conditions that might be compromised by increases in blood pressure. Cases of elevated blood pressure requiring immediate treatment have been reported with Pristiq. **Sustained hypertension**-Sustained blood pressure increases could have adverse consequences. For patients who experience a sustained increase in blood pressure while receiving Pristiq, either dose reduction or discontinuation should be considered [see Adverse Reactions (6.1)]. Treatment with Pristiq in controlled studies was associated with sustained hypertension, defined as treatment-emergent systolic diastolic blood pressure (SDBP)  $\geq$ 90 mm Hg and  $\geq$ 10 mm Hg above baseline for 3 consecutive on-therapy visits. In clinical studies, regarding the proportion of patients with sustained hypertension, the following rates were observed: placebo (0.5%), Pristiq 50 mg (1.3%), Pristiq 100 mg (0.7%), Pristiq 200 mg (1.1%), and Pristiq 400 mg (2.3%). Analyses of patients in Pristiq controlled studies who met criteria for sustained hypertension revealed a



FOR MAJOR DEPRESSIVE DISORDER

## Help your patients

## on a path forward with proven SNRI therapy

It's not just about starting your adult patients with MDD on therapy; it's about helping them toward their treatment goals. Patients should be periodically reassessed to determine the need for continued treatment.<sup>1</sup>

### PRISTIQ 50 mg:

- SNRI therapy with efficacy proven in 8-week clinical studies
- Discontinuation rate due to adverse events comparable to placebo in 8-week clinical studies
- One recommended therapeutic dose from the start<sup>1</sup>

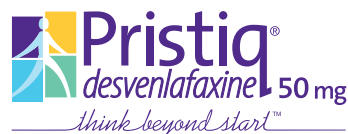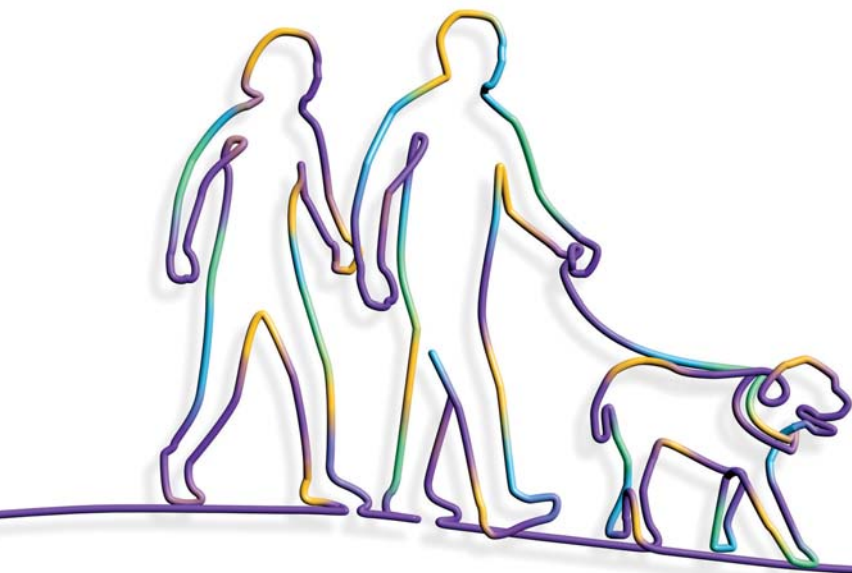

### Important Treatment Considerations for PRISTIQ

PRISTIQ is indicated for the treatment of major depressive disorder in adults.

#### WARNING: SUICIDALITY AND ANTIDEPRESSANT DRUGS

Antidepressants increased the risk compared to placebo of suicidal thinking and behavior (suicidality) in children, adolescents, and young adults in short-term studies of Major Depressive Disorder (MDD) and other psychiatric disorders. Anyone considering the use of PRISTIQ or any other antidepressant in a child, adolescent, or young adult must balance this risk with the clinical need. Short-term studies did not show an increase in the risk of suicidality with antidepressants compared to placebo in adults beyond age 24; there was a reduction in risk with antidepressants compared to placebo in adults aged 65 and older. Depression and certain other psychiatric disorders are themselves associated with increases in the risk of suicide. Patients of all ages who are started on antidepressant therapy should be monitored appropriately and observed closely for clinical worsening, suicidality, or unusual changes in behavior. Families and caregivers should be advised of the need for close observation and communication with the prescriber. PRISTIQ is not approved for use in pediatric patients.

#### Contraindications

- PRISTIQ is contraindicated in patients with a known hypersensitivity to PRISTIQ or venlafaxine.
- PRISTIQ must not be used concomitantly with an MAOI or within 14 days of stopping an MAOI. Allow 7 days after stopping PRISTIQ before starting an MAOI.

#### Warnings and Precautions

- All patients treated with antidepressants should be monitored appropriately and observed closely for clinical worsening, suicidality, and unusual changes in behavior, especially during the first few months of treatment and when changing the dose. Consider changing the therapeutic regimen, including possibly discontinuing the medication, in patients whose depression is persistently worse or includes symptoms of anxiety, agitation, panic attacks, insomnia, irritability, hostility, aggressiveness, impulsivity, akathisia, hypomania, mania, or suicidality that are severe, abrupt in onset, or were not part of the patient's presenting symptoms. Families and caregivers of patients being treated with antidepressants should be alerted about the need to monitor patients.
- Development of a potentially life-threatening serotonin syndrome or Neuroleptic Malignant Syndrome-like reactions have been reported with SNRIs and SSRIs alone, including PRISTIQ treatment, but particularly with concomitant use of serotonergic drugs, including triptans, with drugs that impair the metabolism of serotonin (including MAOIs), or with antipsychotics or other dopamine antagonists. If concomitant use with a triptan is clinically warranted, careful observation of the patient is advised, particularly during treatment initiation and dose increases. Concomitant use of PRISTIQ with serotonin precursors is not recommended.
- Patients receiving PRISTIQ should have regular monitoring of blood pressure since increases in blood pressure were observed in clinical studies. Pre-existing hypertension should be controlled before starting PRISTIQ. Caution should be exercised in treating patients with pre-existing hypertension or other underlying conditions that might be compromised by increases in blood pressure. Cases of elevated blood pressure requiring immediate treatment have been reported. For patients who experience a sustained increase in blood pressure, either dose reduction or discontinuation should be considered.

- SSRIs and SNRIs, including PRISTIQ, may increase the risk of bleeding events. Concomitant use of aspirin, NSAIDs, warfarin, and other anticoagulants may add to this risk.
- Mydriasis has been reported in association with PRISTIQ; therefore, patients with raised intraocular pressure or those at risk of acute narrow-angle glaucoma (angle-closure glaucoma) should be monitored.
- PRISTIQ is not approved for use in bipolar depression. Prior to initiating treatment with an antidepressant, patients should be adequately screened to determine the risk of bipolar disorder.
- As with all antidepressants, PRISTIQ should be used cautiously in patients with a history or family history of mania or hypomania, or with a history of seizure disorder.
- Caution is advised in administering PRISTIQ to patients with cardiovascular, cerebrovascular, or lipid metabolism disorders. Increases in blood pressure and small increases in heart rate were observed in clinical studies with PRISTIQ. PRISTIQ has not been evaluated systematically in patients with a recent history of myocardial infarction, unstable heart disease, uncontrolled hypertension, or cerebrovascular disease.
- Dose-related elevations in fasting serum total cholesterol, LDL (low density lipoprotein) cholesterol, and triglycerides were observed in clinical studies. Measurement of serum lipids should be considered during PRISTIQ treatment.
- On discontinuation, adverse events, some of which may be serious, have been reported with PRISTIQ and other SSRIs and SNRIs. Abrupt discontinuation of PRISTIQ has been associated with the appearance of new symptoms. Patients should be monitored for symptoms when discontinuing treatment. A gradual reduction in dose rather than abrupt cessation is recommended whenever possible.
- The recommended dose in patients with severe renal impairment or end-stage renal disease (ESRD) is 50 mg every other day. The dose should not be escalated in patients with moderate or severe renal impairment or ESRD.
- Products containing desvenlafaxine and products containing venlafaxine should not be used concomitantly with PRISTIQ.
- Hyponatremia may occur as a result of treatment with SSRIs and SNRIs, including PRISTIQ. Discontinuation of PRISTIQ should be considered in patients with symptomatic hyponatremia.
- Interstitial lung disease and eosinophilic pneumonia associated with venlafaxine (the parent drug of PRISTIQ) therapy have been rarely reported.

#### Adverse Reactions

- The most commonly observed adverse reactions in patients taking PRISTIQ vs placebo for MDD in short-term fixed-dose premarketing studies (incidence  $\geq 5\%$  and  $\geq 2\times$  the rate of placebo in the 50-mg dose group) were nausea (22% vs 10%), dizziness (13% vs 5%), hyperhidrosis (10% vs 4%), constipation (9% vs 4%), and decreased appetite (5% vs 2%).

Reference: 1. Pristiq<sup>®</sup> (desvenlafaxine) Prescribing Information, Wyeth Pharmaceuticals Inc.

Please see brief summary of Prescribing Information on adjacent pages.

For more information on PRISTIQ, please visit [www.PristiqHCP.com](http://www.PristiqHCP.com).

**Pristiq**<sup>®</sup>  
EXTENDED-RELEASE TABLETS

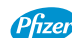

261838-01 © 2009 Pfizer Inc.  
All rights reserved. December 2009
