# THE AMERICAN JOURNAL OF PSYCHIATRY

## EDITOR-IN-CHIEF

Robert Freedman, M.D.

## DEPUTY EDITORS

David A. Lewis, M.D.

Robert Michels, M.D.

Daniel S. Pine, M.D.

Susan K. Schultz, M.D.

Carol A. Tamminga, M.D.

## EDITORIAL STAFF

**Editorial Director**  
Michael D. Roy

**Senior Editor/Features Writer**  
Jane Weaver, E.L.S.

**Senior Editor**  
John J. Guardiano, Ph.D.

**Production Manager**  
Julie C. Blair

**Graphic Designer**  
Steve Hennessey

**Assistant Editor**  
Angela Moore

**Editorial Support Services  
Manager**  
Kourtney Skinner

**Editorial Assistant**  
Samantha Luck

**Administrative Assistant**  
Victoria Chihos

**Assistants to the Editors**  
Lois Lilienthal  
Laura Friedrich  
Rachel Hogg  
Russell A. Scholl

## ASSOCIATE EDITORS

Kathleen T. Brady, M.D., Ph.D.

David A. Brent, M.D.

Linda Brzustowicz, M.D.

Cameron S. Carter, M.D.

Howard H. Goldman, M.D., Ph.D.

Daniel C. Javitt, M.D.

Bankole Johnson, M.D.

Ellen Leibenluft, M.D.

Jeffrey A. Lieberman, M.D.

Barbara Milrod, M.D.

Maria A. Oquendo, M.D.

Jerrold F. Rosenbaum, M.D.

A. John Rush, M.D.

Larry J. Siever, M.D.

Patricia Suppes, M.D., Ph.D.

Myrna M. Weissman, Ph.D.

## EDITOR EMERITA

Nancy C. Andreasen, M.D., Ph.D.

## FORMER EDITORS

Amariah Brigham, M.D.  
1844-1849

T. Romeyn Beck, M.D.  
1849-1854

John P. Gray, M.D.  
1854-1886

G. Alder Blumer, M.D.  
1886-1894

Richard Dewey, M.D.  
1894-1897

Henry M. Hurd, M.D.  
1897-1904

Edward N. Brush, M.D.  
1904-1931

Clarence B. Farrar, M.D.  
1931-1965

Francis J. Braceland, M.D.  
1965-1978

John C. Nemiah, M.D.  
1978-1993

The American Journal of Psychiatry in online at [ajp.psychiatryonline.org](http://ajp.psychiatryonline.org)

# THE AMERICAN PSYCHIATRIC ASSOCIATION

1000 Wilson Blvd., Suite 1825, Arlington, VA 22209-3901  
(888) 357-7924 (toll-free inside the U.S. and Canada) / (703) 907-7300  
web site: [www.psych.org/](http://www.psych.org/) e-mail: [apa@psych.org](mailto:apa@psych.org)

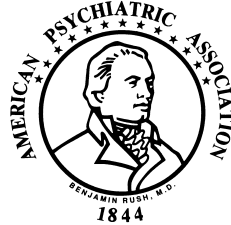

## OFFICERS 2009–2010

|                     |                                 |
|---------------------|---------------------------------|
| President           | Alan F. Schatzberg, M.D.        |
| President-Elect     | Carol A. Bernstein, M.D.        |
| Vice-President      | Jeffrey L. Geller, M.D., M.P.H. |
| Secretary-Treasurer | David Fassler, M.D.             |

## ASSEMBLY

|               |                           |
|---------------|---------------------------|
| Speaker       | Gary S. Weinstein, M.D.   |
| Speaker-Elect | Bruce A. Hershfield, M.D. |
| Recorder      | Ann Marie Sullivan, M.D.  |

## MEDICAL DIRECTOR'S OFFICE

|                          |                            |
|--------------------------|----------------------------|
| Medical Director and CEO | James H. Scully, Jr., M.D. |
|--------------------------|----------------------------|

## BOARD OF TRUSTEES

|                           |                                  |
|---------------------------|----------------------------------|
| Becky Bay, M.D.           | Carolyn B. Robinowitz, M.D.      |
| Thomas K. Ciesla, M.D.    | Pedro Ruiz, M.D.                 |
| Mary Helen Davis, M.D.    | Jacqueline N. Smith, M.D.        |
| Melinda G. Fierros, M.D.  | Joyce A. Spurgeon, M.D.          |
| Dilip V. Jeste, M.D.      | Frederick J. Stoddard, Jr., M.D. |
| James E. Ninger, M.D.     | Nada L. Stotland, M.D., M.P.H.   |
| Roger Peele, M.D.         | John Chapman Urbaitis, M.D.      |
| Kayla M. Pope, M.D., J.D. | John J. Wernert III, M.D.        |
|                           | William M. Womack, M.D.          |

The American Journal of Psychiatry is online at [ajp.psychiatryonline.org](http://ajp.psychiatryonline.org)

THE AMERICAN PSYCHIATRIC ASSOCIATION  
Chairpersons of Councils, Commissions, Committees, and Task Forces

**Standing Committees**

---

**Bylaws**

John O. Gaston, M.D.

**Elections**

Kathleen M. Mogul, M.D.

**Ethics**

Wade C. Myers, M.D.

**Finance and Budget**

Frank W. Brown, M.D.

**Audit**

David Fassler, M.D.

**Investment Oversight**

Larry R. Faulkner, M.D.

**Joint Reference**

Carol A. Bernstein, M.D.

**Membership**

Joseph Ezra V. Rubin, M.D.

**Nominating**

Nadah Stotland, M.D., M.P.H.

**Tellers**

Eliot Sorel, M.D.

**Council on Adult Psychiatry**

---

Thomas N. Wise, M.D.

**Council on Advocacy and  
Government Relations**

---

Robert Paul Cabaj, M.D.

*Advocacy and Litigation Funding*

Jeffrey L. Metzner, M.D.

**Council on Children, Adolescents,  
and Their Families**

---

Michael Houston, M.D.

*Agnes Purcell McGavin Award*

John E. Schowalter, M.D.

*Blanche F. Ittleson Research Award*

Elizabeth B. Weller, M.D.

**Council on Communications**

---

Jeffrey A. Borenstein

**Council on Healthcare Systems  
and Financing**

---

Anita Smith Everett, M.D.

*APA/Business Relations*

Stephen H. Heidel, M.D.

*Reimbursement for Psychiatric Care*

Joseph T. English, M.D.

*RBRVS, Codes and Reimbursement*

Ronald M. Burd, M.D.

**Council on Medical Education and  
Lifelong Learning**

---

Sandra Sexson, M.D.

*APA/SAMHSA Minority Fellowship Selection and  
Advisory*

Maria A. Oquendo, M.D.

*Joint Sponsorship of Continuing Medical  
Education (CME)*

Adam T. Kaul, M.D.

*Scientific Program*

Julio Licino, M.D.

*Scientific Program Committee of the Institute  
on Psychiatric Services*

Stephen M. Goldfinger, M.D.

*Task Force to Update the Ethics Annotations*

Laura W. Roberts, M.D.

*Vestermark Award*

Frederick G. Guggenheim, M.D.

**Council on Minority Health and  
Health Disparities**

---

Sandra C. Walker, M.D.

**Council on Psychiatry And Law**

---

Patricia R. Recupero, M.D., J.D.

*Isaac Ray Award*

Renee L. Binder, M.D.

*Judicial Action*

Jeffrey S. Janofsky, M.D.

*Manfred S. Guttmacher Award*

Marilyn Price, M.D., C.M.

**Council on Research and Quality  
Care**

---

Jeffrey A. Lieberman, M.D.

*Electronic Health Records*

Laura J. Fochtman, M.D.

*Research Awards*

Stuart C. Yudofsky, M.D.

*Steering Committee on Practice Guidelines*

Joel Yager, M.D.

*Task Force on DSM-V*

David J. Kupfer, M.D.

*Task Force on Gender Identity Disorder*

William M. Byne

*Task Force to Revise the Practice of  
Electroconvulsive Therapy*

Sarah H. Lisanby
